# Supplementary material
Source: HighWire-hosted journal article supplement (https://bmjopen.bmj.com/content/12/2/e055137)
Supplement: inline-supplementary-material-4 [file inline-supplementary-material-4.pdf]

## Supplemental Table 1. Baseline Medication Use Administered or Prescribed Within 365 Days Prior to Index Date, by Cohort and Time Period

Prevalence of medication usage within 365 days prior to index, among the Laboratory Positive Cohort and Clinical Cohort, stratified by time period. All values are column percentages, with blue shading visualizing Laboratory Positive Cohort proportionality and red shading representing Clinical Cohort proportionality.

Laboratory Positive Cohort Clinical Cohort

| CHARACTERISTIC                                  | All (N = 37617) | Jan-May (n = 12978) | June-Aug (n = 11416) | Sep-Nov (n = 13223) | All (N = 13893) | Jan-May (n = 7150) | June-Aug (n = 3768) | Sep-Nov (n = 2975) |
|-------------------------------------------------|-----------------|---------------------|----------------------|---------------------|-----------------|--------------------|---------------------|--------------------|
| <b>Antiarrhythmics</b>                          |                 |                     |                      |                     |                 |                    |                     |                    |
| Antiarrhythmics                                 | 2.58            | 2.13                | 2.3                  | 3.25                | 3.57            | 3.44               | 3.32                | 4.2                |
| <b>Anticoagulants</b>                           |                 |                     |                      |                     |                 |                    |                     |                    |
| Anticoagulants                                  | 24.91           | 22.21               | 23.8                 | 28.53               | 29.6            | 28.32              | 29.25               | 33.14              |
| <b>Antihyperlipidemics</b>                      |                 |                     |                      |                     |                 |                    |                     |                    |
| Antihyperlipidemics                             | 39.93           | 38.56               | 36.8                 | 43.97               | 38.15           | 37.64              | 36.33               | 41.68              |
| <b>Antihypertensives</b>                        |                 |                     |                      |                     |                 |                    |                     |                    |
| Angiotensin Receptor Blockers                   | 15.16           | 14.32               | 14.65                | 16.42               | 13.46           | 12.83              | 13.54               | 14.89              |
| Angiotensin-Converting Enzyme Inhibitors        | 21.25           | 20.1                | 20.09                | 23.38               | 20.06           | 18.62              | 18.69               | 21.58              |
| Beta-Blocker                                    | 29.44           | 27.52               | 27.74                | 32.79               | 31.74           | 30.85              | 30.44               | 35.5               |
| Calcium Channel Blockers                        | 24.55           | 24.72               | 23.14                | 25.61               | 24.78           | 24.8               | 23.65               | 26.18              |
| Prazosin                                        | 0.45            | 0.29                | 0.55                 | 0.53                | 0.7             | 0.7                | 0.77                | 0.61               |
| Direct Renin Blocker                            | 0.01            | 0.02                | 0.01                 | 0.01                | 0.03            | 0.04               | 0                   | 0.03               |
| Other Antihypertensives                         | 11.25           | 10.33               | 12.24                | 11.53               | 12.73           | 11.94              | 12.36               | 15.23              |
| <b>Antiplatelets</b>                            |                 |                     |                      |                     |                 |                    |                     |                    |
| Antiplatelets                                   | 31.58           | 29.7                | 29.42                | 35.3                | 31.99           | 31.27              | 30.89               | 35.13              |
| Eculizumab                                      | 0.01            | 0.02                | 0                    | 0.02                | 0.01            | 0                  | 0                   | 0.03               |
| Alteplase                                       | 1.57            | 1.22                | 2.26                 | 1.32                | 1.84            | 1.64               | 2.28                | 1.75               |
| Ravulizumab                                     | 0               | 0                   | 0                    | 0                   | 0               | 0                  | 0                   | 0                  |
| Clopidogrel                                     | 6.5             | 5.76                | 6.26                 | 7.43                | 6.85            | 6.13               | 6.9                 | 8.54               |
| Tirofiban                                       | 0.02            | 0.01                | 0.01                 | 0.04                | 0.01            | 0                  | 0                   | 0.03               |
| Dipyridamole                                    | 0.5             | 0.23                | 0.83                 | 0.47                | 0.43            | 0.41               | 0.32                | 0.64               |
| Aspirin                                         |                 |                     |                      |                     |                 |                    |                     |                    |
| Aspirin                                         | 28.89           | 27.54               | 26.31                | 32.45               | 28.48           | 29.16              | 28.11               | 31.97              |
| Aspirin Low-Dose (≤ 81 Mg)                      | 25.99           | 25.4                | 24.05                | 28.24               | 26.8            | 26.63              | 25.29               | 29.14              |
| Aspirin High-Dose (> 81 Mg)                     | 5.3             | 4.42                | 4.13                 | 7.15                | 6.31            | 6.6                | 5.65                | 6.42               |
| Other Antiplatelets                             | 1.29            | 1.06                | 1.3                  | 1.51                | 1.32            | 1.24               | 1.3                 | 1.55               |
| <b>Diuretics</b>                                |                 |                     |                      |                     |                 |                    |                     |                    |
| Diuretics                                       | 26.55           | 24.26               | 25.2                 | 29.98               | 28.87           | 28.34              | 27.07               | 32.44              |
| <b>Cancer Therapies</b>                         |                 |                     |                      |                     |                 |                    |                     |                    |
| Cancer Therapies                                | 5.77            | 5.72                | 5.15                 | 6.37                | 7.05            | 6.81               | 7.01                | 7.66               |
| Immunomodulators                                |                 |                     |                      |                     |                 |                    |                     |                    |
| Immunomodulators                                | 1.66            | 1.81                | 1.41                 | 1.74                | 2.07            | 2.18               | 2.04                | 1.85               |
| IL3 Inhibitors                                  | 0               | 0                   | 0                    | 0                   | 0.01            | 0.01               | 0                   | 0.03               |
| IL6 Inhibitors                                  | 0.04            | 0.03                | 0.04                 | 0.05                | 0.03            | 0.03               | 0.03                | 0.03               |
| Other Immunomodulators                          | 1.63            | 1.78                | 1.38                 | 1.69                | 2.05            | 2.17               | 2.02                | 1.82               |
| Hematopoietic Growth Factor                     |                 |                     |                      |                     |                 |                    |                     |                    |
| Hematopoietic Growth Factor                     | 1.76            | 2.13                | 1.71                 | 1.44                | 2.4             | 2.45               | 2.1                 | 2.69               |
| Erythropoiesis-Stimulating Agents               | 1.4             | 1.7                 | 1.39                 | 1.11                | 1.76            | 1.89               | 1.38                | 1.95               |
| Other Hematopoietic Growth Factors              | 0.41            | 0.52                | 0.35                 | 0.37                | 0.73            | 0.69               | 0.74                | 0.81               |
| Myelosuppressive Chemotherapy                   |                 |                     |                      |                     |                 |                    |                     |                    |
| Myelosuppressive Chemotherapy                   | 2.34            | 2.13                | 1.97                 | 2.87                | 2.92            | 2.6                | 3.21                | 3.33               |
| High Or Intermediate Myelosuppressive Potential | 2.02            | 1.77                | 1.73                 | 2.5                 | 2.54            | 2.18               | 2.97                | 2.86               |
| Other Myelosuppressive Chemotherapies           | 0.48            | 0.48                | 0.34                 | 0.59                | 0.55            | 0.57               | 0.42                | 0.67               |
| Other Antineoplastics                           | 1.05            | 0.86                | 0.86                 | 1.41                | 1.38            | 1.47               | 0.98                | 1.68               |
| <b>Antidiabetics</b>                            |                 |                     |                      |                     |                 |                    |                     |                    |
| Antidiabetics                                   | 29.95           | 29.07               | 29.82                | 30.94               | 27.54           | 26.39              | 27.39               | 30.49              |
| Insulin                                         | 17.97           | 16.81               | 18.65                | 18.52               | 18.28           | 17.79              | 17.65               | 20.27              |
| Insulin Sensitizing Agents                      | 17.3            | 16.95               | 16.63                | 18.23               | 13.98           | 13.86              | 14.3                | 15.76              |
| Other Antidiabetics                             | 13.11           | 12.27               | 12.82                | 14.36               | 10.77           | 9.69               | 11.42               | 12.27              |
| <b>Systemic Steroids</b>                        |                 |                     |                      |                     |                 |                    |                     |                    |
| Systemic Steroids                               | 26.37           | 21.44               | 25.59                | 31.88               | 26.76           | 25.54              | 29.78               | 35.23              |
| Budesonide (Systemic)                           |                 |                     |                      |                     |                 |                    |                     |                    |
| Budesonide (Systemic)                           | 0.21            | 0.1                 | 0.21                 | 0.32                | 0.25            | 0.25               | 0.27                | 0.24               |
| Budesonide (Oral)                               | 0.21            | 0.1                 | 0.21                 | 0.32                | 0.25            | 0.25               | 0.27                | 0.24               |
| Budesonide (Rectal)                             | 0               | 0                   | 0                    | 0                   | 0               | 0                  | 0                   | 0                  |
| Hydrocortisone (Systemic)                       |                 |                     |                      |                     |                 |                    |                     |                    |
| Hydrocortisone (Systemic)                       | 4.19            | 4.66                | 3.6                  | 4.24                | 4.55            | 4.64               | 4.41                | 4.5                |
| Hydrocortisone (Oral)                           | 0.36            | 0.25                | 0.39                 | 0.39                | 0.34            | 0.34               | 0.32                | 0.37               |
| Hydrocortisone (Rectal)                         | 0.12            | 0.11                | 0.15                 | 0.09                | 0.12            | 0.08               | 0.27                | 0.03               |
| Hydrocortisone (Injection)                      | 1.05            | 1.33                | 0.8                  | 1                   | 1.7             | 1.85               | 1.41                | 1.71               |
| Methylprednisolone (Systemic)                   |                 |                     |                      |                     |                 |                    |                     |                    |
| Methylprednisolone (Systemic)                   | 8.51            | 7.4                 | 8.3                  | 9.79                | 10.43           | 10.07              | 10.06               | 11.76              |
| Methylprednisolone (Injection)                  | 5.15            | 4.75                | 4.6                  | 5.97                | 7.18            | 7.31               | 6.34                | 7.5                |
| Methylprednisolone (Oral)                       | 4.42            | 3.41                | 4.98                 | 4.94                | 4.52            | 3.8                | 5.18                | 5.41               |
| Dexamethasone (Systemic)                        |                 |                     |                      |                     |                 |                    |                     |                    |
| Dexamethasone (Systemic)                        | 9.99            | 6.05                | 10.18                | 13.7                | 10.83           | 7.97               | 11.86               | 16.4               |
| Dexamethasone (Injection)                       | 6.22            | 4.95                | 6.39                 | 7.31                | 7.7             | 6.46               | 8.04                | 10.25              |
| Dexamethasone (Oral)                            | 3.85            | 1.12                | 3.78                 | 6.6                 | 3.34            | 1.87               | 3.64                | 6.49               |
| Prednisone (Systemic)                           |                 |                     |                      |                     |                 |                    |                     |                    |
| Prednisone (Systemic)                           | 12.42           | 10.29               | 11.82                | 14.93               | 15.27           | 14.95              | 15.18               | 16.13              |
| Prednisone (Oral)                               | 12.42           | 10.29               | 11.82                | 14.93               | 15.27           | 14.95              | 15.18               | 16.13              |
| Other Systemic Steroids                         | 2.7             | 2.38                | 2.43                 | 3.24                | 2.94            | 2.5                | 2.97                | 3.93               |
| <b>Inhaled Steroids</b>                         |                 |                     |                      |                     |                 |                    |                     |                    |
| Inhaled Steroids                                | 12.83           | 12.06               | 11.55                | 14.69               | 13.97           | 14.81              | 12.53               | 13.78              |
| Beclothemason (Inhaled)                         | 0.51            | 0.53                | 0.42                 | 0.54                | 0.62            | 0.77               | 0.53                | 0.37               |
| Budesonide (Inhaled)                            | 1.81            | 1.66                | 1.79                 | 1.96                | 2.82            | 3.05               | 2.31                | 2.92               |
| Ciclesonide (Inhaled)                           | 0.09            | 0.13                | 0.03                 | 0.09                | 0.21            | 0.24               | 0.11                | 0.27               |
| Fluticasone (Inhaled)                           | 10.99           | 10.19               | 9.93                 | 12.89               | 11.44           | 12.03              | 10.38               | 11.86              |
| Mometasone (Inhaled)                            | 0.63            | 0.59                | 0.48                 | 0.79                | 0.73            | 0.7                | 0.82                | 0.71               |
| Other Steroids                                  | 11.71           | 11.07               | 10.47                | 13.42               | 12.08           | 12.7               | 10.93               | 12.03              |
| Other Steroids (Ophthalmic)                     | 1.34            | 1.39                | 1.18                 | 1.43                | 1.48            | 1.68               | 1.25                | 1.28               |
| Other Steroids (Nasal)                          | 10.65           | 9.97                | 9.51                 | 12.29               | 11.03           | 11.59              | 9.95                | 11.03              |
| <b>Bronchodilators</b>                          |                 |                     |                      |                     |                 |                    |                     |                    |
| Bronchodilators                                 | 30.6            | 27.52               | 29.34                | 34.7                | 35.32           | 33.8               | 35.01               | 39.36              |
| Formoterol                                      | 4.42            | 4.01                | 3.67                 | 5.48                | 6.5             | 6.87               | 6.32                | 8.85               |
| Montelukast                                     | 5.01            | 4.31                | 4.59                 | 6.05                | 5.51            | 5.06               | 5.65                | 6.39               |
| Other Bronchodilators                           | 29.04           | 26.3                | 27.78                | 32.83               | 34.16           | 32.81              | 33.6                | 38.12              |
| <b>DMARDs</b>                                   |                 |                     |                      |                     |                 |                    |                     |                    |
| DMARDs                                          | 3.12            | 2.92                | 2.79                 | 3.59                | 3.56            | 3.47               | 3.66                | 3.63               |
| Cyclophosphamide                                | 0.14            | 0.17                | 0.11                 | 0.13                | 0.25            | 0.25               | 0.19                | 0.34               |
| Leflunomide                                     | 0.24            | 0.19                | 0.22                 | 0.31                | 0.24            | 0.24               | 0.24                | 0.24               |
| Methotrexate                                    | 0.9             | 0.72                | 0.81                 | 1.13                | 1.05            | 0.77               | 1.49                | 1.18               |
| Mycophenolate                                   | 0.81            | 0.89                | 0.73                 | 0.79                | 1.07            | 1.26               | 0.74                | 1.01               |
| Sulfasalazine                                   | 0.28            | 0.18                | 0.28                 | 0.36                | 0.24            | 0.18               | 0.35                | 0.27               |
| Abatacept                                       | 0.03            | 0.02                | 0.02                 | 0.05                | 0.06            | 0.03               | 0.11                | 0.07               |
| Rituximab                                       | 0.27            | 0.33                | 0.15                 | 0.32                | 0.37            | 0.32               | 0.45                | 0.4                |
| Tocilizumab                                     | 0.03            | 0.02                | 0.04                 | 0.05                | 0.02            | 0.03               | 0                   | 0.03               |
| Adalimumab                                      | 0.19            | 0.21                | 0.16                 | 0.2                 | 0.29            | 0.36               | 0.21                | 0.2                |
| Anakinra                                        | 0               | 0                   | 0                    | 0                   | 0.01            | 0.01               | 0                   | 0.03               |
| Apremilast                                      | 0.07            | 0.06                | 0.09                 | 0.08                | 0.04            | 0.03               | 0.03                | 0.07               |
| Certolizumab Pegol                              | 0.03            | 0.02                | 0.01                 | 0.05                | 0.08            | 0.06               | 0.13                | 0.07               |
| Etanercept                                      | 0.1             | 0.09                | 0.11                 | 0.1                 | 0.14            | 0.1                | 0.29                | 0.07               |
| Golimumab                                       | 0.02            | 0.02                | 0.03                 | 0.01                | 0.04            | 0.01               | 0.08                | 0.03               |
| Infliximab                                      | 0.09            | 0.05                | 0.09                 | 0.14                | 0.12            | 0.13               | 0.05                | 0.17               |
| Azathioprine                                    | 0.25            | 0.19                | 0.25                 | 0.32                | 0.26            | 0.22               | 0.29                | 0.3                |
| Tofacitinib                                     | 0.13            | 0.13                | 0.09                 | 0.16                | 0.09            | 0.08               | 0.13                | 0.07               |
| Upadacitinib                                    | 0.02            | 0.02                | 0                    | 0.05                | 0               | 0                  | 0                   | 0                  |
| Canakinumab                                     | 0               | 0                   | 0                    | 0                   | 0               | 0                  | 0                   | 0                  |
| Rilonacept                                      | 0               | 0                   | 0                    | 0                   | 0               | 0                  | 0                   | 0                  |
| Sarilumab                                       | 0.01            | 0.02                | 0                    | 0.01                | 0.01            | 0                  | 0.03                | 0                  |
| Siltuximab                                      | 0               | 0                   | 0                    | 0                   | 0               | 0                  | 0                   | 0                  |
| Other DMARDs                                    | 0.54            | 0.52                | 0.51                 | 0.61                | 0.48            | 0.5                | 0.42                | 0.5                |
| <b>Antivirals</b>                               |                 |                     |                      |                     |                 |                    |                     |                    |
| Antivirals                                      | 4.64            | 5.19                | 4.22                 | 4.48                | 4.92            | 5.64               | 4.59                | 3.6                |
| HIV Antivirals                                  | 0.52            | 0.73                | 0.52                 | 0.33                | 0.67            | 0.92               | 0.53                | 0.24               |
| Influenza Antivirals                            | 2.18            | 2.66                | 1.94                 | 1.92                | 2.17            | 2.67               | 1.88                | 1.34               |
| Other Antivirals                                | 2.13            | 2.07                | 1.94                 | 2.36                | 2.44            | 2.56               | 2.47                | 2.12               |
| <b>Analgesics</b>                               |                 |                     |                      |                     |                 |                    |                     |                    |
| Analgesics                                      | 51.03           | 48.45               | 50.57                | 53.96               | 54.24           | 52.13              | 55.39               | 57.88              |
| Acetaminophen                                   | 38.93           | 37.53               | 38.73                | 40.5                | 42.46           | 41.68              | 42.17               | 44.71              |
| NSAIDs                                          |                 |                     |                      |                     |                 |                    |                     |                    |
| NSAIDs                                          | 24.89           | 22.87               | 25                   | 25.65               | 25.77           | 24.6               | 27.04               | 26.96              |
| Ibuprofen                                       | 11.6            | 11.87               | 11.7                 | 11.24               | 12.75           | 12.5               | 13.61               | 12.24              |
| Naproxen                                        | 4.55            | 4.36                | 4.84                 | 4.5                 | 4.92            | 5.2                | 4.78                | 4.44               |
| Indomethacin                                    | 0.61            | 0.48                | 0.62                 | 0.72                | 0.71            | 0.69               | 0.79                | 0.77               |
| Other NSAIDs                                    | 14.54           | 12.88               | 14.93                | 15.74               | 15.7            | 14.53              | 16.48               | 17.51              |
| Opioids                                         | 31.27           | 26.69               | 32.27                | 34.3                | 35.69           | 32.38              | 38.19               | 40.47              |
| Other Analgesics                                | 1.65            | 1.31                | 1.48                 | 2.13                | 1.88            | 1.52               | 2.42                | 2.05               |
| <b>Antipsychotics</b>                           |                 |                     |                      |                     |                 |                    |                     |                    |
| Antipsychotics                                  | 12.21           | 11.99               | 11.55                |                     |                 |                    |                     |                    |
