# Supplementary material
Source: HighWire-hosted journal article supplement (https://bmjopen.bmj.com/content/12/2/e055137)
Supplement: inline-supplementary-material-5 [file inline-supplementary-material-5.pdf]

## Supplemental Table 2. Baseline Medication Use Administered or Prescribed Within 30 Days Prior to Index Date, by Cohort and Time Period

Prevalence of medication usage within 30 days prior to index, among the Laboratory Positive Cohort and Clinical Cohort, stratified by time period. All values are column percentages, with blue shading visualizing Laboratory Positive Cohort proportionality and red shading representing Clinical Cohort proportionality.

| CHARACTERISTIC                                  | Laboratory Positive Cohort |                     |                      |                     | Clinical Cohort |                    |                     |                    |
|-------------------------------------------------|----------------------------|---------------------|----------------------|---------------------|-----------------|--------------------|---------------------|--------------------|
|                                                 | All (N = 37617)            | Jan-May (n = 12978) | June-Aug (n = 11416) | Sep-Nov (n = 13223) | All (N = 13893) | Jan-May (n = 7150) | June-Aug (n = 3768) | Sep-Nov (n = 2975) |
| <b>Antiarrhythmics</b>                          |                            |                     |                      |                     |                 |                    |                     |                    |
| Antiarrhythmics                                 | 1.2                        | 1.06                | 1.04                 | 1.47                | 1.86            | 1.85               | 1.86                | 1.88               |
| <b>Anticoagulants</b>                           |                            |                     |                      |                     |                 |                    |                     |                    |
| Anticoagulants                                  | 10.9                       | 9.8                 | 10.29                | 12.81               | 13.47           | 12.83              | 13.88               | 14.52              |
| <b>Antihyperlipidemics</b>                      |                            |                     |                      |                     |                 |                    |                     |                    |
| Antihyperlipidemics                             | 25.55                      | 27.08               | 22.94                | 26.3                | 24.57           | 24.42              | 24.02               | 25.65              |
| <b>Antihypertensives</b>                        |                            |                     |                      |                     |                 |                    |                     |                    |
| Angiotensin-Receptor Blockers                   | 9.18                       | 9.35                | 8.86                 | 9.29                | 8.08            | 7.52               | 8.63                | 8.71               |
| Angiotensin-Converting Enzyme Inhibitors        | 12.48                      | 12.88               | 11.62                | 12.85               | 11.78           | 11.79              | 12.02               | 11.13              |
| Beta-Blocker                                    | 17.74                      | 18.62               | 15.89                | 18.47               | 19.39           | 19.33              | 19.35               | 19.6               |
| Calcium Channel Blockers                        | 14.53                      | 16.33               | 13.43                | 13.72               | 14.21           | 14.32              | 14.04               | 14.15              |
| Prazosin                                        | 0.23                       | 0.15                | 0.31                 | 0.24                | 0.4             | 0.39               | 0.5                 | 0.27               |
| Direct Renin Blocker                            | 0.01                       | 0.01                | 0                    | 0.01                | 0.01            | 0.01               | 0                   | 0                  |
| Other Antihypertensives                         | 4.34                       | 4.76                | 4.28                 | 3.95                | 4.94            | 4.85               | 4.64                | 5.51               |
| <b>Antiplatelets</b>                            |                            |                     |                      |                     |                 |                    |                     |                    |
| Antiplatelets                                   | 18.14                      | 18.65               | 16.14                | 19.35               | 18.74           | 17.66              | 18.21               | 20.71              |
| Eculizumab                                      | 0.01                       | 0.01                | 0                    | 0.02                | 0               | 0                  | 0                   | 0                  |
| Ategloase                                       | 0.28                       | 0.22                | 0.38                 | 0.27                | 0.42            | 0.32               | 0.66                | 0.37               |
| Ravulizumab                                     | 0                          | 0                   | 0                    | 0                   | 0               | 0                  | 0                   | 0                  |
| Clopidogrel                                     | 3.47                       | 3.53                | 3.04                 | 3.8                 | 3.85            | 3.37               | 4.01                | 4.81               |
| Tirofiban                                       | 0                          | 0                   | 0                    | 0                   | 0.01            | 0                  | 0                   | 0.03               |
| Dipyridamole                                    | 0.08                       | 0.07                | 0.12                 | 0.05                | 0.09            | 0.07               | 0.05                | 0.2                |
| Aspirin                                         |                            |                     |                      |                     |                 |                    |                     |                    |
| Aspirin                                         | 16.33                      | 16.82               | 14.35                | 17.56               | 16.81           | 16                 | 17.06               | 18.45              |
| Aspirin Low-Dose (<= 81 Mg)                     | 14.91                      | 15.59               | 13.32                | 15.79               | 15.28           | 14.63              | 15.34               | 16.77              |
| Aspirin High-Dose (> 81 Mg)                     | 1.14                       | 1.56                | 1.52                 | 2.11                | 2.16            | 2.07               | 2.34                | 2.15               |
| Other Antiplatelets                             | 0.6                        | 0.52                | 0.52                 | 0.74                | 0.58            | 0.63               | 0.48                | 0.61               |
| <b>Diuretics</b>                                |                            |                     |                      |                     |                 |                    |                     |                    |
| Diuretics                                       | 14.94                      | 14.99               | 14.2                 | 15.53               | 16.56           | 16.63              | 15.98               | 17.11              |
| <b>Cancer Therapies</b>                         |                            |                     |                      |                     |                 |                    |                     |                    |
| Cancer Therapies                                | 2.97                       | 3.1                 | 2.64                 | 3.14                | 3.92            | 3.9                | 3.77                | 4.15               |
| Immunomodulators                                |                            |                     |                      |                     |                 |                    |                     |                    |
| Immunomodulators                                | 1.02                       | 1.07                | 0.98                 | 0.99                | 1.29            | 1.37               | 1.33                | 1.04               |
| IL1 Inhibitors                                  | 0                          | 0                   | 0                    | 0                   | 0               | 0                  | 0                   | 0                  |
| IL6 Inhibitors                                  | 0.02                       | 0.01                | 0.01                 | 0.03                | 0.01            | 0.01               | 0                   | 0.03               |
| Other Immunomodulators                          | 1                          | 1.06                | 0.97                 | 0.97                | 1.27            | 1.36               | 1.33                | 1.01               |
| Hematopoietic Growth Factor                     |                            |                     |                      |                     |                 |                    |                     |                    |
| Hematopoietic Growth Factor                     | 0.63                       | 0.87                | 0.49                 | 0.51                | 0.86            | 0.97               | 0.72                | 0.81               |
| Erythropoiesis-Stimulating Agents               | 0.5                        | 0.72                | 0.39                 | 0.39                | 0.7             | 0.83               | 0.48                | 0.67               |
| Other Hematopoietic Growth Factors              | 0.14                       | 0.17                | 0.11                 | 0.14                | 0.18            | 0.17               | 0.24                | 0.13               |
| Myelosuppressive Chemotherapy                   |                            |                     |                      |                     |                 |                    |                     |                    |
| Myelosuppressive Chemotherapy                   | 1.11                       | 0.95                | 1.01                 | 1.37                | 1.53            | 1.38               | 1.65                | 1.75               |
| High Or Intermediate Myelosuppressive Potential | 0.93                       | 0.76                | 0.88                 | 1.13                | 1.27            | 1.1                | 1.46                | 1.41               |
| Other Myelosuppressive Chemotherapies           | 0.25                       | 0.24                | 0.14                 | 0.36                | 0.32            | 0.34               | 0.27                | 0.37               |
| Other Antineoplastics                           | 0.53                       | 0.52                | 0.42                 | 0.64                | 0.77            | 0.8                | 0.66                | 0.84               |
| <b>Antidiabetics</b>                            |                            |                     |                      |                     |                 |                    |                     |                    |
| Antidiabetics                                   | 19.36                      | 19.78               | 18.94                | 19.32               | 17.8            | 17.52              | 17.68               | 18.62              |
| Insulin                                         | 9.46                       | 9.13                | 9.68                 | 9.63                | 9.8             | 10.03              | 9.13                | 10.08              |
| Insulin Sensitizing Agents                      | 10.78                      | 11.54               | 10.09                | 10.63               | 8.57            | 8.1                | 9                   | 9.14               |
| Other Antidiabetics                             | 7.93                       | 7.91                | 7.56                 | 8.27                | 6.73            | 6.28               | 7.27                | 7.13               |
| <b>Systemic Steroids</b>                        |                            |                     |                      |                     |                 |                    |                     |                    |
| Systemic Steroids                               | 10.92                      | 7.41                | 10.45                | 14.77               | 11.74           | 9.92               | 12                  | 15.8               |
| Budesonide (Systemic)                           |                            |                     |                      |                     |                 |                    |                     |                    |
| Budesonide (Systemic)                           | 0.06                       | 0.03                | 0.07                 | 0.09                | 0.07            | 0.08               | 0.08                | 0.03               |
| Budesonide (Oral)                               | 0.06                       | 0.03                | 0.07                 | 0.09                | 0.07            | 0.08               | 0.08                | 0.03               |
| Budesonide (Rectal)                             | 0                          | 0                   | 0                    | 0                   | 0               | 0                  | 0                   | 0                  |
| Hydrocortisone (Systemic)                       |                            |                     |                      |                     |                 |                    |                     |                    |
| Hydrocortisone (Systemic)                       | 1.33                       | 1.49                | 1.15                 | 1.33                | 1.38            | 1.22               | 1.49                | 1.65               |
| Hydrocortisone (Oral)                           | 0.14                       | 0.12                | 0.13                 | 0.15                | 0.18            | 0.17               | 0.11                | 0.3                |
| Hydrocortisone (Rectal)                         | 0.01                       | 0.03                | 0.01                 | 0                   | 0.04            | 0.04               | 0.05                | 0                  |
| Hydrocortisone (Injection)                      | 0.28                       | 0.33                | 0.23                 | 0.29                | 0.42            | 0.41               | 0.42                | 0.44               |
| Methylprednisolone (Systemic)                   |                            |                     |                      |                     |                 |                    |                     |                    |
| Methylprednisolone (Systemic)                   | 1.8                        | 1.37                | 1.8                  | 2.22                | 2.39            | 2.45               | 2.1                 | 2.62               |
| Methylprednisolone (Injection)                  | 0.92                       | 0.7                 | 0.86                 | 1.18                | 1.46            | 1.65               | 1.06                | 1.51               |
| Methylprednisolone (Oral)                       | 0.94                       | 0.71                | 1.02                 | 1.1                 | 0.99            | 0.84               | 1.11                | 1.21               |
| Dexamethasone (Systemic)                        |                            |                     |                      |                     |                 |                    |                     |                    |
| Dexamethasone (Systemic)                        | 4.22                       | 1.33                | 4.16                 | 7.12                | 3.4             | 1.78               | 3.77                | 6.82               |
| Dexamethasone (Injection)                       | 1.14                       | 0.87                | 1.24                 | 1.32                | 1.3             | 1.16               | 1.27                | 1.65               |
| Dexamethasone (Oral)                            | 3.14                       | 0.5                 | 3                    | 5.84                | 2.14            | 0.63               | 2.47                | 5.34               |
| Prednisone (Systemic)                           |                            |                     |                      |                     |                 |                    |                     |                    |
| Prednisone (Systemic)                           | 4.74                       | 3.98                | 4.42                 | 5.76                | 6.23            | 6.24               | 6.08                | 6.42               |
| Prednisone (Oral)                               | 4.74                       | 3.98                | 4.42                 | 5.76                | 6.23            | 6.24               | 6.08                | 6.42               |
| Other Systemic Steroids                         | 0.45                       | 0.37                | 0.45                 | 0.54                | 0.45            | 0.34               | 0.45                | 0.71               |
| <b>Inhaled Steroids</b>                         |                            |                     |                      |                     |                 |                    |                     |                    |
| Inhaled Steroids                                | 5.99                       | 6.22                | 5.05                 | 6.58                | 6.69            | 6.94               | 6.32                | 6.59               |
| Beclomethasone (Inhaled)                        | 0.25                       | 0.25                | 0.22                 | 0.27                | 0.27            | 0.32               | 0.24                | 0.2                |
| Budesonide (Inhaled)                            | 0.68                       | 0.63                | 0.6                  | 0.79                | 1               | 1.06               | 0.85                | 1.04               |
| Ciclesonide (Inhaled)                           | 0.07                       | 0.11                | 0.03                 | 0.08                | 0.18            | 0.21               | 0.11                | 0.2                |
| Fluticasone (Inhaled)                           | 5                          | 5.24                | 4.15                 | 5.5                 | 5.48            | 5.59               | 5.25                | 5.48               |
| Mometasone (Inhaled)                            | 0.23                       | 0.22                | 0.21                 | 0.25                | 0.22            | 0.27               | 0.24                | 0.1                |
| Other Steroids                                  | 5.17                       | 5.39                | 4.37                 | 5.63                | 5.38            | 5.52               | 5.04                | 5.45               |
| Other Steroids (Ophthalmic)                     | 0.44                       | 0.44                | 0.34                 | 0.53                | 0.41            | 0.46               | 0.42                | 0.27               |
| Other Steroids (Nasal)                          | 4.79                       | 5.04                | 4.05                 | 5.17                | 5.05            | 5.17               | 4.67                | 5.21               |
| <b>Bronchodilators</b>                          |                            |                     |                      |                     |                 |                    |                     |                    |
| Bronchodilators                                 | 16.66                      | 16.62               | 15.95                | 18.98               | 20.35           | 19.86              | 20.22               | 21.68              |
| Formoterol                                      | 2.23                       | 2.22                | 1.86                 | 2.55                | 3.27            | 3.43               | 3.24                | 2.92               |
| Montelukast                                     | 2.84                       | 2.69                | 2.61                 | 3.18                | 3.25            | 2.97               | 3.34                | 3.83               |
| Other Bronchodilators                           | 15.28                      | 15.58               | 13.74                | 16.33               | 19.11           | 18.85              | 18.71               | 20.24              |
| <b>DMARDs</b>                                   |                            |                     |                      |                     |                 |                    |                     |                    |
| DMARDs                                          | 1.69                       | 1.59                | 1.59                 | 1.88                | 2.08            | 2.14               | 1.94                | 2.12               |
| Cyclophosphamide                                | 0.04                       | 0.05                | 0.02                 | 0.05                | 0.1             | 0.14               | 0.03                | 0.1                |
| Leflunomide                                     | 0.12                       | 0.07                | 0.12                 | 0.17                | 0.12            | 0.13               | 0.13                | 0.1                |
| Methotrexate                                    | 0.47                       | 0.38                | 0.48                 | 0.55                | 0.6             | 0.5                | 0.74                | 0.67               |
| Mycophenolate                                   | 0.49                       | 0.52                | 0.49                 | 0.47                | 0.68            | 0.84               | 0.4                 | 0.64               |
| Sulfasalazine                                   | 0.12                       | 0.11                | 0.09                 | 0.16                | 0.11            | 0.1                | 0.16                | 0.07               |
| Abatacept                                       | 0.01                       | 0.02                | 0                    | 0.01                | 0.01            | 0                  | 0                   | 0.03               |
| Rituximab                                       | 0.08                       | 0.09                | 0.04                 | 0.11                | 0.12            | 0.08               | 0.19                | 0.13               |
| Tocilizumab                                     | 0.01                       | 0                   | 0.01                 | 0.03                | 0.01            | 0.01               | 0                   | 0.03               |
| Adalimumab                                      | 0.03                       | 0.11                | 0.09                 | 0.08                | 0.14            | 0.15               | 0.13                | 0.1                |
| Anakinra                                        | 0                          | 0                   | 0                    | 0                   | 0               | 0                  | 0                   | 0                  |
| Apremilast                                      | 0.03                       | 0.04                | 0.04                 | 0.03                | 0.03            | 0.01               | 0.03                | 0.07               |
| Certalizumab Pegol                              | 0.02                       | 0.01                | 0.01                 | 0.03                | 0.05            | 0.04               | 0.08                | 0.03               |
| Etanercept                                      | 0.04                       | 0.03                | 0.07                 | 0.02                | 0.06            | 0.06               | 0.08                | 0.07               |
| Golimumab                                       | 0.01                       | 0.02                | 0                    | 0.01                | 0.01            | 0                  | 0.03                | 0                  |
| Infliximab                                      | 0.05                       | 0.02                | 0.04                 | 0.08                | 0.06            | 0.06               | 0.05                | 0.07               |
| Azathioprine                                    | 0.14                       | 0.08                | 0.16                 | 0.17                | 0.14            | 0.1                | 0.16                | 0.24               |
| Tofacitinib                                     | 0.05                       | 0.05                | 0.04                 | 0.05                | 0.04            | 0.04               | 0.05                | 0                  |
| Upadacitinib                                    | 0.02                       | 0.01                | 0                    | 0.04                | 0               | 0                  | 0                   | 0                  |
| Canakinumab                                     | 0                          | 0                   | 0                    | 0                   | 0               | 0                  | 0                   | 0                  |
| Rilonacept                                      | 0                          | 0                   | 0                    | 0                   | 0               | 0                  | 0                   | 0                  |
| Sarilumab                                       | 0                          | 0.01                | 0                    | 0                   | 0               | 0                  | 0                   | 0                  |
| Siltuximab                                      | 0                          | 0                   | 0                    | 0                   | 0               | 0                  | 0                   | 0                  |
| Other DMARDs                                    | 0.26                       | 0.24                | 0.24                 | 0.29                | 0.22            | 0.21               | 0.19                | 0.27               |
| <b>Antivirals</b>                               |                            |                     |                      |                     |                 |                    |                     |                    |
| Antivirals                                      | 1.55                       | 2.31                | 1.16                 | 1.15                | 1.77            | 2.29               | 1.35                | 1.04               |
| HIV Antivirals                                  | 0.37                       | 0.55                | 0.39                 | 0.2                 | 0.48            | 0.66               | 0.37                | 0.17               |
| Influenza Antivirals                            | 0.5                        | 1.12                | 0.15                 | 0.18                | 0.53            | 0.84               | 0.27                | 0.13               |
| Other Antivirals                                | 0.71                       | 0.7                 | 0.64                 | 0.79                | 0.86            | 0.95               | 0.8                 | 0.74               |
| <b>Analgesics</b>                               |                            |                     |                      |                     |                 |                    |                     |                    |
| Analgesics                                      | 26.39                      | 27.07               | 24.79                | 27.1                | 30.47           | 28.99              | 32.25               | 31.76              |
| Acetaminophen                                   | 18.44                      | 19.84               | 17.06                | 18.25               | 21.62           | 21.41              | 21.82               | 23.88              |
| <b>NSAIDs</b>                                   |                            |                     |                      |                     |                 |                    |                     |                    |
| NSAIDs                                          | 8.41                       | 7.98                | 8.51                 | 8.78                | 9.37            | 8.49               | 10.32               | 10.29              |
| Ibuprofen                                       | 3.75                       | 3.93                | 3.63                 | 3.68                | 4.43            | 3.93               | 5.12                | 4.77               |
| Naproxen                                        | 1.41                       | 1.36                | 1.46                 | 1.41                | 1.48            | 1.51               | 1.46                | 1.41               |
| Indomethacin                                    | 0.02                       | 0.17                | 0.23                 | 0.22                | 0.19            | 0.25               | 0.08                | 0.2                |
| Other NSAIDs                                    | 3.83                       | 3.21                | 4                    | 4.3                 | 4.35            | 3.87               | 4.75                | 4.97               |
| Opioids                                         | 12                         | 10.48               | 11.84                | 13.83               | 15.97           | 14.11              | 17.91               | 17.98              |
| Other Analgesics                                | 0.72                       | 0.63                | 0.6                  | 0.89                | 0.71            | 0.55               | 1.06                | 0.67               |
| <b>Antipsychotics</b>                           |                            |                     |                      |                     |                 |                    |                     |                    |
| Antipsychotics                                  | 5.42                       | 5.76                | 5.04                 | 5.41                | 6.4             | 6.67               | 6.79                | 7.13               |
| <b>Bone Density Regulators</b>                  |                            |                     |                      |                     |                 |                    |                     |                    |
| Bone Density Regulators                         | 1.17                       | 0.97                | 0.97                 | 1.53                | 1.19            | 1.05               | 1.27                | 1.4                |
