# Supplementary material
Source: HighWire-hosted journal article supplement (https://bmjopen.bmj.com/content/12/2/e055137)

## Supplemental Figure 3. Proportion of patients without test by month

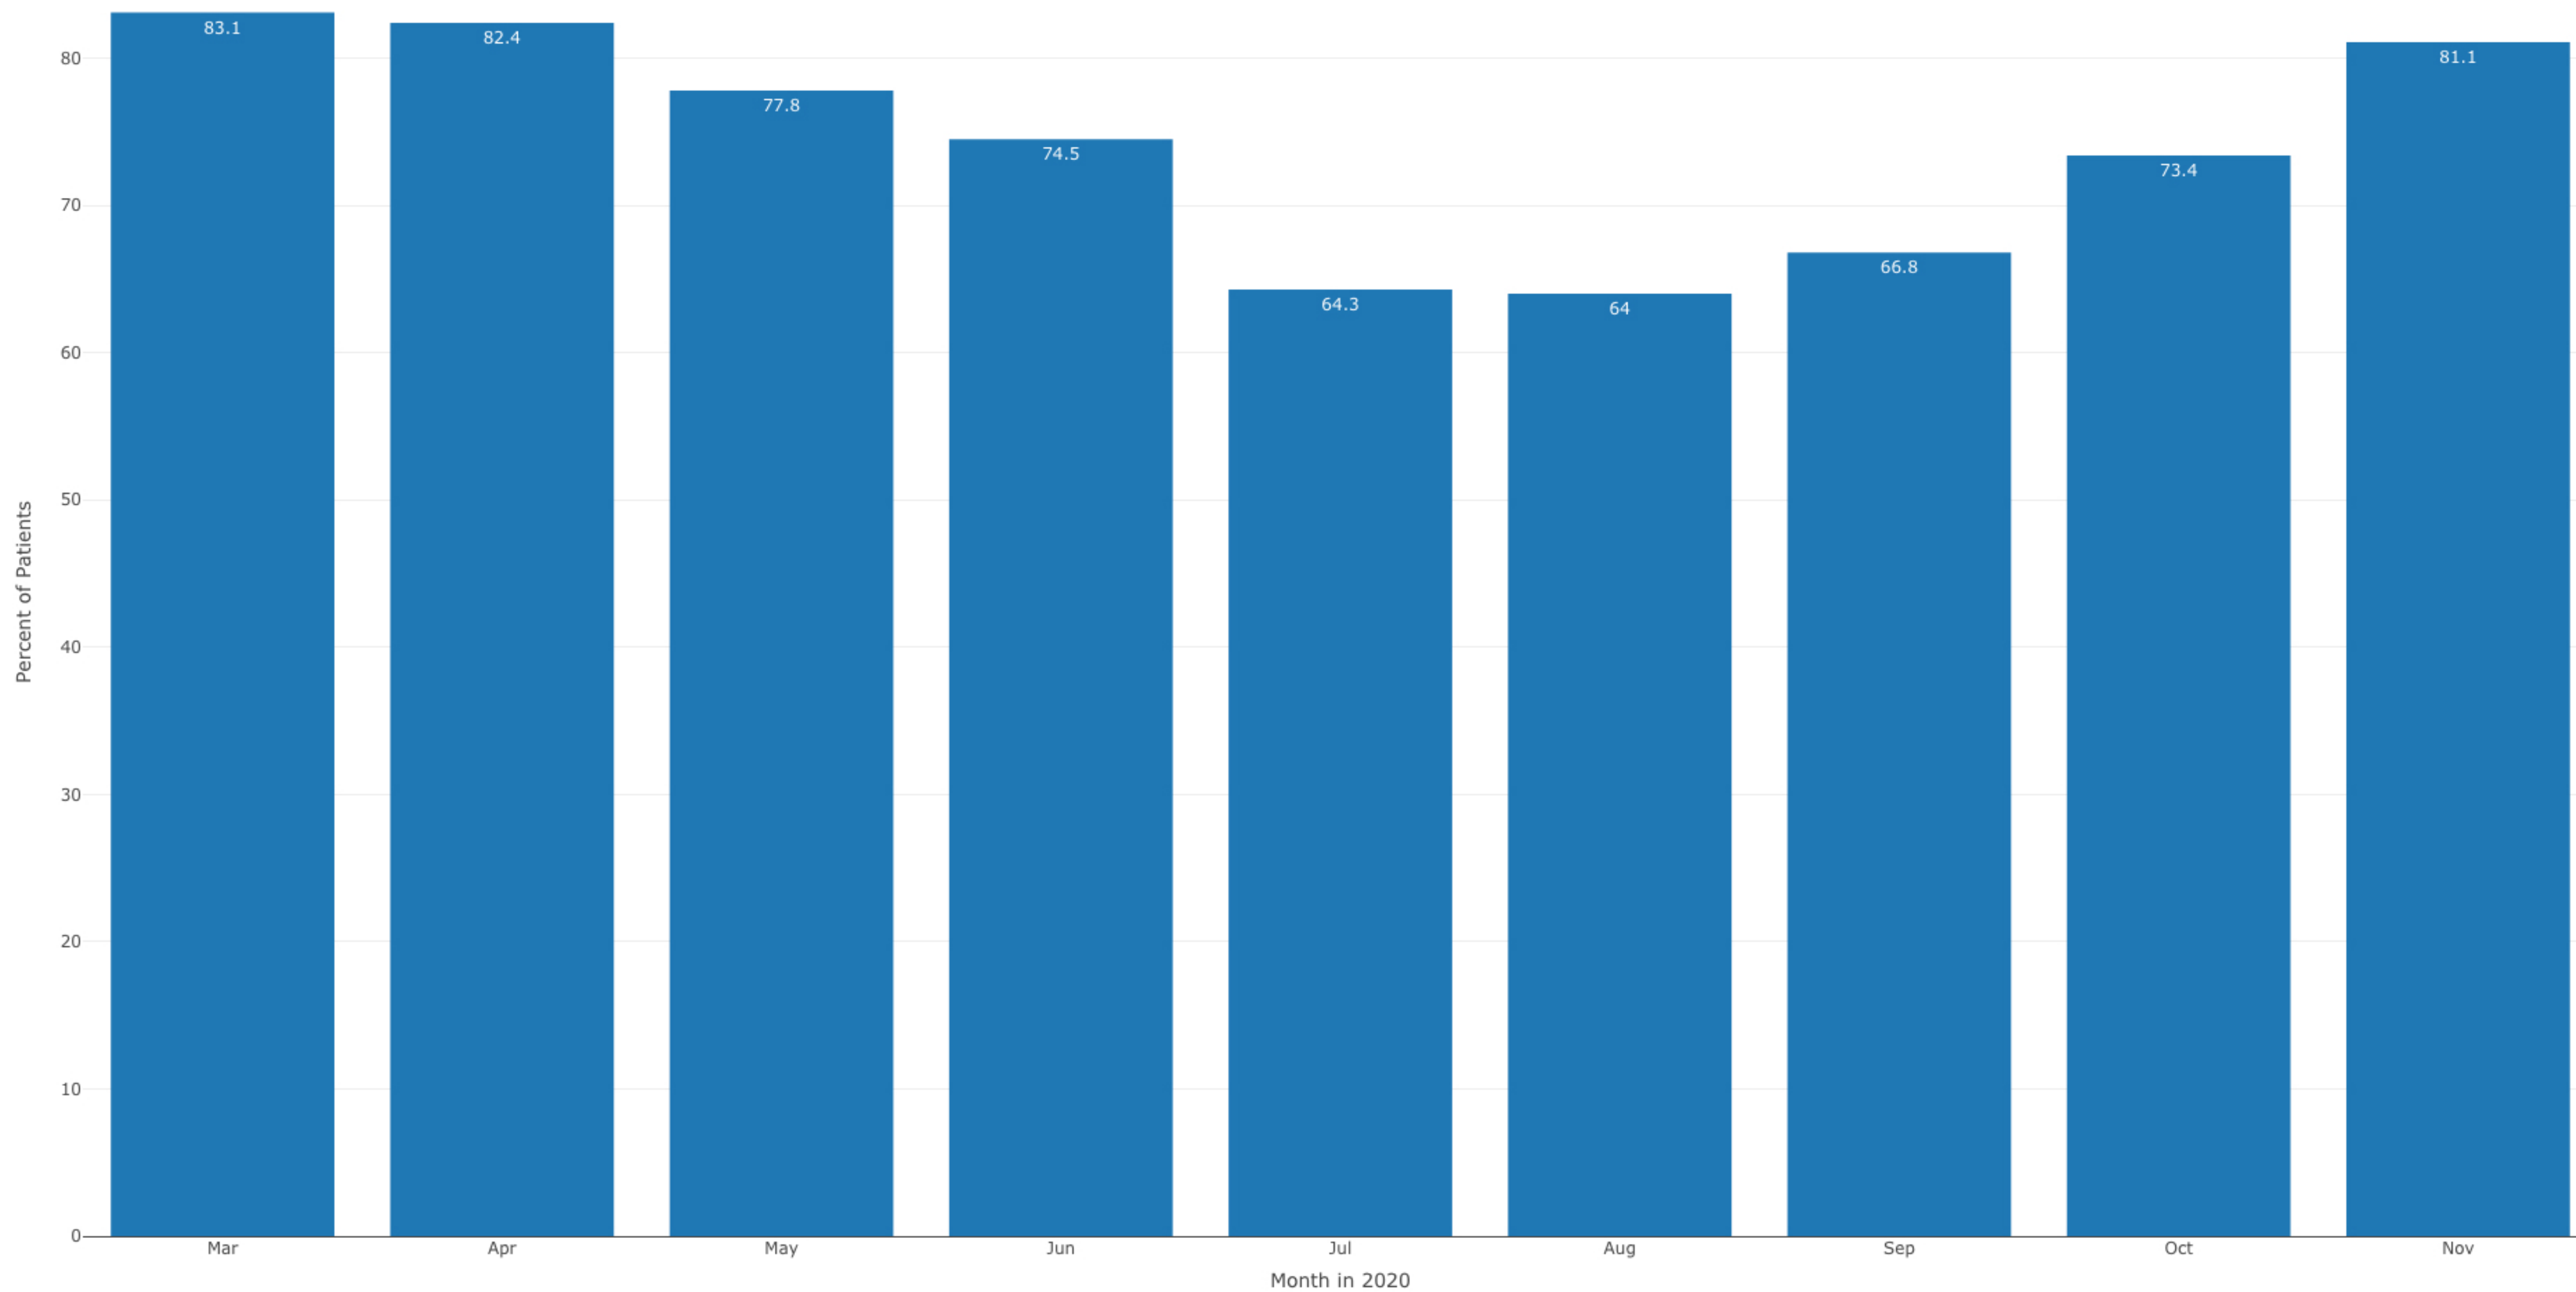

Supplement: inline-supplementary-material-6 [file inline-supplementary-material-6.pdf]
