# Supplementary material
Source: HighWire-hosted journal article supplement (https://bmjopen.bmj.com/content/12/2/e055137)
Supplement: inline-supplementary-material-7 [file inline-supplementary-material-7.pdf]

## Supplemental Table 3. All COVID-19 Treatments by Cohort and Time Period

Prevalence of COVID-19 treatments among the Laboratory Positive Cohort and Clinical Cohort, used from hospital admission date to the earlier of death or hospital discharge, stratified by time period. All values are column percentages, with blue shading visualizing Laboratory Positive Cohort proportionality and red shading representing Clinical Cohort proportionality.

| CHARACTERISTIC                           | Laboratory Positive Cohort |                     |                      |                     | Clinical Cohort |                    |                     |                    |
|------------------------------------------|----------------------------|---------------------|----------------------|---------------------|-----------------|--------------------|---------------------|--------------------|
|                                          | All (N = 37637)            | Jan-May (n = 12978) | June-Aug (n = 11446) | Sep-Nov (n = 13233) | All (N = 12893) | Jan-May (n = 7150) | June-Aug (n = 3768) | Sep-Nov (n = 2975) |
| <b>Antibiotics</b>                       |                            |                     |                      |                     |                 |                    |                     |                    |
| Antibiotics                              | 66.57                      | 78.36               | 61.01                | 59.8                | 65.6            | 68.28              | 63.16               | 62.25              |
| Amoxicillin                              | 4                          | 3.71                | 4.46                 | 3.89                | 4.46            | 4.45               | 4.41                | 4.57               |
| Augmentin                                | 0.07                       | 0.08                | 0.05                 | 0.07                | 0.09            | 0.1                | 0.13                | 0.03               |
| Azithromycin                             | 41.47                      | 55.75               | 34.41                | 33.56               | 36.8            | 43.64              | 29.38               | 29.78              |
| Doxycycline                              | 11.4                       | 18.35               | 7.45                 | 8.01                | 9.97            | 11.9               | 7.8                 | 8.07               |
| Tetracycline                             | 0.01                       | 0                   | 0.01                 | 0.02                | 0.03            | 0.06               | 0                   | 0                  |
| Levofloxacin                             | 4.71                       | 3.93                | 4.38                 | 5.76                | 5.76            | 5.89               | 5.28                | 6.05               |
| Moxifloxacin                             | 0.37                       | 0.65                | 0.15                 | 0.28                | 0.4             | 0.31               | 0.58                | 0.37               |
| Clindamycin                              | 0.74                       | 0.59                | 0.88                 | 0.77                | 1.53            | 1.38               | 2.1                 | 1.38               |
| Sulfamethoxazole-Trimethoprim            | 1.51                       | 1.73                | 1.45                 | 1.35                | 2.2             | 2.17               | 2.49                | 1.92               |
| Metronidazole                            | 3.66                       | 3.56                | 3.82                 | 3.61                | 5.54            | 5.51               | 5.68                | 5.41               |
| Cephalexin                               | 1.64                       | 1.14                | 1.77                 | 2.02                | 1.92            | 1.45               | 1.73                | 1.41               |
| Ceftriaxone                              | 45.06                      | 54.65               | 41.49                | 38.74               | 45.21           | 46.21              | 35.08               | 35.66              |
| Vancomycin                               | 16.57                      | 23.42               | 13.15                | 12.8                | 22.49           | 23.85              | 20.25               | 22.08              |
| Other Antibiotics                        | 10.65                      | 11.32               | 10.06                | 10.5                | 17.99           | 15.39              | 20.22               | 17.71              |
| <b>Anticoagulants</b>                    |                            |                     |                      |                     |                 |                    |                     |                    |
| Anticoagulants                           | 84.8                       | 89.34               | 83.71                | 81.3                | 74.63           | 76.55              | 71.44               | 73.98              |
| Defibrinolytic                           | 0                          | 0                   | 0                    | 0                   | 0               | 0                  | 0                   | 0                  |
| Enoxaparin                               | 65.12                      | 65.45               | 67.13                | 63.06               | 52.07           | 53.03              | 50.11               | 52.34              |
| Fondaparinux                             | 0.2                        | 0.22                | 0.23                 | 0.16                | 0.21            | 0.22               | 0.13                | 0.27               |
| Dalteparin                               | 0                          | 0                   | 0                    | 0                   | 0               | 0                  | 0                   | 0                  |
| Bivalirudin                              | 4.73                       | 4.92                | 4.2                  | 5                   | 3.29            | 3.26               | 3.61                | 2.96               |
| Apixaban                                 | 11.23                      | 9.72                | 11.65                | 12.35               | 9.2             | 8.7                | 9                   | 10.66              |
| Edoxaban                                 | 0                          | 0                   | 0                    | 0                   | 0               | 0                  | 0                   | 0                  |
| Betrixaban                               | 0                          | 0                   | 0                    | 0                   | 0               | 0                  | 0                   | 0                  |
| Warfarin                                 | 2.44                       | 2.54                | 1.95                 | 2.76                | 2.79            | 2.9                | 2.92                | 2.35               |
| Heparin                                  | 28.06                      | 39.1                | 22.39                | 22.11               | 28.96           | 31.3               | 26.06               | 27.03              |
| Other Anticoagulants                     | 0.86                       | 1.4                 | 0.67                 | 0.51                | 1.23            | 1.45               | 0.88                | 1.01               |
| <b>Antiplatelets</b>                     |                            |                     |                      |                     |                 |                    |                     |                    |
| Antiplatelets                            | 36.03                      | 35.07               | 36.83                | 36.26               | 32.47           | 32.45              | 31.95               | 33.18              |
| Aspirin                                  | 30.77                      | 29.41               | 30.07                | 32.7                | 27.5            | 27.78              | 26.43               | 28.2               |
| Low-dose (<= 81 Mg)                      | 27.7                       | 26.79               | 27.86                | 28.46               | 24.96           | 25.12              | 24.02               | 25.75              |
| High-dose (> 81 Mg)                      | 4.38                       | 5.17                | 3.48                 | 6.08                | 5.2             | 5.72               | 4.72                | 4.54               |
| Ecosulfam                                | 0                          | 0                   | 0.01                 | 0                   | 0               | 0                  | 0                   | 0                  |
| Atorvastatin                             | 5.49                       | 6.37                | 7.49                 | 2.9                 | 5.17            | 5.31               | 5.55                | 4.34               |
| Rivaroxaban                              | 0                          | 0                   | 0                    | 0                   | 0               | 0                  | 0                   | 0                  |
| Clopidogrel                              | 5.7                        | 5.49                | 5.38                 | 6.18                | 5.67            | 5.41               | 5.44                | 6.59               |
| Ticlopidine                              | 0.03                       | 0.01                | 0.04                 | 0.05                | 0.04            | 0.04               | 0.03                | 0.03               |
| Dipyridamol                              | 0.08                       | 0.08                | 0.1                  | 0.06                | 0.14            | 0.15               | 0.08                | 0.17               |
| Other Antiplatelets                      | 1.03                       | 0.83                | 1.09                 | 1.18                | 1.07            | 1.02               | 0.96                | 1.31               |
| <b>Antidiabetics</b>                     |                            |                     |                      |                     |                 |                    |                     |                    |
| Antidiabetics                            | 40.1                       | 40.88               | 41.58                | 38.06               | 34.51           | 34.66              | 33.33               | 35.63              |
| Insulin                                  | 39.22                      | 40.11               | 40.78                | 37.01               | 33.89           | 34.29              | 32.51               | 34.66              |
| Insulin Sensitizing Agents               | 5.66                       | 5.73                | 6.11                 | 5.2                 | 3.85            | 3.76               | 4.09                | 3.76               |
| Other Antidiabetics                      | 4.32                       | 3.58                | 4.87                 | 4.57                | 2.93            | 2.81               | 3.26                | 2.79               |
| <b>Antihyperlipidemics</b>               |                            |                     |                      |                     |                 |                    |                     |                    |
| Antihyperlipidemics                      | 36.09                      | 36.76               | 34.36                | 36.93               | 31.97           | 33.27              | 29.88               | 31.46              |
| Simvastatin                              | 3.93                       | 4.51                | 3.01                 | 4.17                | 3.14            | 3.31               | 2.47                | 3.56               |
| Atorvastatin                             | 26.5                       | 26.59               | 26.54                | 26.38               | 23.85           | 25.09              | 22.45               | 22.82              |
| Fluvastatin                              | 0.01                       | 0.02                | 0                    | 0                   | 0.01            | 0.01               | 0                   | 0                  |
| Lovastatin                               | 0.34                       | 0.18                | 0.37                 | 0.47                | 0.22            | 0.15               | 0.19                | 0.4                |
| Pravastatin                              | 0.02                       | 0.01                | 0.02                 | 0.03                | 0.02            | 0.01               | 0.03                | 0.03               |
| Rosuvastatin                             | 2.66                       | 3.32                | 1.95                 | 2.62                | 2.55            | 2.63               | 2.42                | 2.52               |
| Pravastatin                              | 2.63                       | 2.35                | 2.52                 | 2.99                | 2.99            | 2.92               | 2.18                | 2.32               |
| Evolocumab                               | 0.01                       | 0.01                | 0                    | 0.02                | 0.01            | 0                  | 0                   | 0.03               |
| Other Antihyperlipidemics                | 3.31                       | 2.74                | 3.53                 | 3.7                 | 2.65            | 2.22               | 2.87                | 3.39               |
| <b>Antihypertensives</b>                 |                            |                     |                      |                     |                 |                    |                     |                    |
| Antihypertensives                        | 53.9                       | 53.87               | 53.57                | 54.2                | 48.87           | 48.78              | 48.89               | 49.04              |
| Angiotensin-Receptor Blockers            | 10.38                      | 9.29                | 10.27                | 11.58               | 8.34            | 8                  | 8.7                 | 8.71               |
| Angiotensin-Converting Enzyme Inhibitors | 13.56                      | 12.32               | 13.64                | 14.89               | 11.92           | 12.15              | 12.02               | 11.33              |
| Beta-Blocker                             | 32.25                      | 32.76               | 31.03                | 32.81               | 31.97           | 31.55              | 32.09               | 32.81              |
| Calcium Channel Blocker                  | 24.93                      | 26.07               | 24.54                | 24.15               | 22.7            | 23.78              | 23.07               | 22.81              |
| Prazosin                                 | 0.29                       | 0.23                | 0.32                 | 0.32                | 0.35            | 0.34               | 0.5                 | 0.2                |
| Direct Renin Blocker                     | 0.01                       | 0.01                | 0.01                 | 0.01                | 0               | 0                  | 0                   | 0                  |
| Other Antihypertensives                  | 16.88                      | 15.29               | 19.43                | 13.96               | 15.02           | 14.6               | 16.48               | 14.18              |
| <b>Antiarrhythmics</b>                   |                            |                     |                      |                     |                 |                    |                     |                    |
| Antiarrhythmics                          | 4.91                       | 6.23                | 3.92                 | 4.48                | 6.61            | 6.9                | 6.05                | 6.62               |
| Amlodipine                               | 4.5                        | 6.04                | 3.48                 | 3.87                | 6.15            | 6.55               | 5.57                | 5.95               |
| Other Antiarrhythmics                    | 0.49                       | 0.28                | 0.51                 | 0.68                | 0.6             | 0.45               | 0.64                | 0.94               |
| <b>Antivirals</b>                        |                            |                     |                      |                     |                 |                    |                     |                    |
| Antivirals                               | 28.29                      | 9.05                | 30.17                | 45.53               | 13.39           | 7.68               | 12.69               | 28                 |
| <b>Antineoplastic and Antiparasitic</b>  |                            |                     |                      |                     |                 |                    |                     |                    |
| Antineoplastic and Antiparasitic         | 21.51                      | 52.75               | 5.77                 | 4.42                | 13.34           | 19.73              | 6.87                | 6.15               |
| Hydroxychloroquine                       | 18.38                      | 50.82               | 1.36                 | 0.67                | 7.87            | 14.99              | 0.85                | 0.61               |
| Hydroxychloroquine With Zinc             | 5.64                       | 15.74               | 0.54                 | 0.14                | 1.91            | 3.59               | 0.19                | 0.07               |
| Chloroquine                              | 0.01                       | 0.02                | 0                    | 0                   | 0.03            | 0.06               | 0                   | 0                  |
| Chloroquine With Zinc                    | 0                          | 0                   | 0                    | 0                   | 0               | 0                  | 0                   | 0                  |
| Mefloquine                               | 0                          | 0                   | 0                    | 0                   | 0               | 0                  | 0                   | 0                  |
| Mefloquine With Zinc                     | 0                          | 0                   | 0                    | 0                   | 0               | 0                  | 0                   | 0                  |
| Primaquine                               | 0.01                       | 0.01                | 0.02                 | 0                   | 0.04            | 0.06               | 0.03                | 0.03               |
| Primaquine With Zinc                     | 0.01                       | 0.01                | 0.01                 | 0                   | 0               | 0                  | 0                   | 0                  |
| Levamisole                               | 0                          | 0                   | 0                    | 0                   | 0               | 0                  | 0                   | 0                  |
| Ivermectin                               | 0.32                       | 0.16                | 0.74                 | 0.11                | 0.06            | 0.03               | 0.13                | 0.03               |
| Nitazoxanide                             | 0.52                       | 1.52                | 0                    | 0                   | 0.05            | 0.08               | 0.03                | 0                  |
| Atovaquone                               | 0.09                       | 0.18                | 0.05                 | 0.04                | 0.27            | 0.39               | 0.13                | 0.17               |
| <b>Bronchodilators</b>                   |                            |                     |                      |                     |                 |                    |                     |                    |
| Bronchodilators                          | 56.83                      | 56.84               | 58.21                | 55.62               | 50.3            | 49.57              | 50.05               | 51.46              |
| Formoterol                               | 5.17                       | 6.39                | 3.56                 | 5.38                | 6.91            | 8.42               | 5.44                | 5.14               |
| Montelukast                              | 3.98                       | 3.79                | 3.64                 | 4.46                | 3.87            | 3.83               | 3.87                | 3.97               |
| Other Bronchodilators                    | 55.91                      | 55.85               | 57.51                | 54.59               | 49.2            | 48.57              | 48.94               | 50.59              |
| <b>Immunomodulators</b>                  |                            |                     |                      |                     |                 |                    |                     |                    |
| Immunomodulators                         | 1.07                       | 1.25                | 0.95                 | 1.01                | 1.27            | 1.31               | 1.22                | 1.21               |
| Thalidomide                              | 0                          | 0                   | 0                    | 0                   | 0               | 0                  | 0                   | 0                  |
| Tacrolimus                               | 0.67                       | 0.76                | 0.61                 | 0.64                | 0.83            | 0.99               | 0.69                | 0.64               |
| Cyclosporine                             | 0.26                       | 0.29                | 0.17                 | 0.3                 | 0.3             | 0.21               | 0.4                 | 0.4                |
| Emapalumab                               | 0                          | 0                   | 0                    | 0                   | 0               | 0                  | 0                   | 0                  |
| Lenalidomide                             | 0.03                       | 0.05                | 0.04                 | 0                   | 0.03            | 0.01               | 0.03                | 0.07               |
| Apremilast                               | 0.02                       | 0.05                | 0.02                 | 0                   | 0.01            | 0.01               | 0.03                | 0                  |
| Baricitinib                              | 0.02                       | 0                   | 0.05                 | 0.02                | 0.01            | 0.01               | 0                   | 0                  |
| Sintolim                                 | 0.05                       | 0.07                | 0.01                 | 0.05                | 0.05            | 0.04               | 0.08                | 0.03               |
| Other Immunomodulators                   | 0.07                       | 0.08                | 0.07                 | 0.05                | 0.11            | 0.14               | 0.08                | 0.07               |
| <b>Analgesics</b>                        |                            |                     |                      |                     |                 |                    |                     |                    |
| Analgesics                               | 86.25                      | 92.96               | 85.28                | 80.5                | 77.78           | 79.02              | 77.71               | 74.89              |
| Acetaminophen                            | 80.02                      | 89.37               | 77.72                | 72.82               | 71.52           | 74.08              | 70.78               | 66.29              |
| <b>NSAIDs</b>                            |                            |                     |                      |                     |                 |                    |                     |                    |
| NSAIDs                                   | 16.94                      | 13.73               | 19.51                | 17.87               | 16.58           | 13.61              | 21.2                | 17.88              |
| Ibuprofen                                | 7.97                       | 6.56                | 9.68                 | 7.8                 | 6.81            | 5.83               | 8.89                | 6.52               |
| Naproxen                                 | 0.76                       | 0.65                | 0.95                 | 0.7                 | 0.78            | 0.81               | 0.91                | 0.57               |
| Indomethacin                             | 0.23                       | 0.23                | 0.25                 | 0.22                | 0.25            | 0.2                | 0.21                | 0.44               |
| Other Analgesics                         | 0.78                       | 0.67                | 0.77                 | 0.89                | 0.64            | 0.5                | 0.88                | 0.67               |
| <b>Steroids</b>                          |                            |                     |                      |                     |                 |                    |                     |                    |
| Steroids                                 | 56.25                      | 35.06               | 62.89                | 71.32               | 48.57           | 40.83              | 53.5                | 60.94              |
| <b>Systemic Steroids</b>                 |                            |                     |                      |                     |                 |                    |                     |                    |
| Systemic Steroids                        | 53.92                      | 31.34               | 61.32                | 69.77               | 45.83           | 37.64              | 51.06               | 58.89              |
| Budesonide (Systemic)                    | 0.44                       | 0.05                | 0.85                 | 0.45                | 0.15            | 0.11               | 0.24                | 0.13               |
| Budesonide (Oral)                        | 0.44                       | 0.05                | 0.85                 | 0.45                | 0.15            | 0.11               | 0.24                | 0.13               |
| Budesonide (Rectal)                      | 0                          | 0                   | 0                    | 0                   | 0               | 0                  | 0                   | 0                  |
| Hydrocortisone (Systemic)                | 4.35                       | 5.81                | 3.45                 | 3.67                | 5.3             | 5.02               | 5.55                | 5.68               |
| Hydrocortisone (Oral)                    | 0.59                       | 0.48                | 0.82                 | 0.51                | 0.66            | 0.64               | 0.72                | 0.61               |
| Hydrocortisone (Rectal)                  | 0.05                       | 0.05                | 0.06                 | 0.02                | 0.09            | 0.13               | 0.08                | 0                  |
| Hydrocortisone (Injection)               | 2.83                       | 4.13                | 1.83                 | 2.41                | 3.95            | 3.72               | 4.01                | 4.44               |
| Methylprednisolone (Systemic)            | 16.02                      | 20.29               | 12.43                | 14.94               | 18.94           | 21.99              | 15.68               | 15.26              |
| Methylprednisolone (Injection)           | 13.4                       | 18.96               | 9.22                 | 11.54               | 16.71           | 20.28              | 13                  | 12.84              |
| Methylprednisolone (Oral)                | 3.38                       | 1.74                | 3.78                 | 4.65                | 2.61            | 2.04               | 3.11                | 3.36               |
| Dexamethasone (Systemic)                 | 37.51                      | 4.91                | 50.57                | 58.24               | 20.81           | 5.87               | 11.23               | 43.53              |
| Dexamethasone (Injection)                | 29.95                      | 4.37                | 42.7                 | 44.06               | 16.45           | 5.24               | 25.11               | 32.37              |
| Dexamethasone (Oral)                     | 15.85                      | 0.65                | 16.88                | 28.64               | 6.01            | 0.78               | 7.67                | 16.47              |
| Prednisone (Systemic)                    | 12.52                      | 12.21               | 10.67                | 14.84               | 17.82           | 21.76              | 14.04               | 13.14              |
| Prednisone (Oral)                        | 12.52                      | 12.21               | 10.67                | 14.84               | 17.82           | 21.76              | 14.04               | 13.14              |
| <b>Inhaled Steroids</b>                  |                            |                     |                      |                     |                 |                    |                     |                    |
| Inhaled Steroids                         | 7.8                        | 6.7                 | 7.6                  | 9.38                | 8.19            | 8.1                | 8.09                | 8.54               |
| Beclomethasone (Inhaled)                 | 0.15                       | 0.2                 | 0.08                 | 0.15                | 0.08            | 0.07               | 0.11                | 0.07               |
| Budesonide (Inhaled)                     | 2.3                        | 1.43                | 2.89                 | 2.84                | 3.04            | 2.81               | 3.08                | 3.53               |
| Ciclesonide (Inhaled)                    | 0.02                       | 0.02                | 0.01                 | 0.02                | 0.03            | 0.03               | 0.03                | 0.03               |
| Fluticasone (Inhaled)                    | 5.55                       | 5.18                | 4.81                 | 6.54                | 5.44            | 5.68               |                     |                    |
