# Supplementary material
Source: HighWire-hosted journal article supplement (https://bmjopen.bmj.com/content/12/2/e055137)
Supplement: inline-supplementary-material-10 [file inline-supplementary-material-10.pdf]

## Supplemental Table 4. Patient Counts and Cumulative Risk of All Outcomes by Month, Standardized by Age and Sex, and Interaction of Age and Sex

| Outcome             | Cohort              | Month     | N    | Person Time | Events | Rate | Cumulative Risk (%) |
|---------------------|---------------------|-----------|------|-------------|--------|------|---------------------|
| ARDS                | Laboratory Positive | March     | 3986 | 24538       | 770    | 0.03 | 18.9 (17.5, 20.3)   |
| ARDS                | Laboratory Positive | April     | 6259 | 38635       | 839    | 0.02 | 13.1 (12.2, 14.0)   |
| ARDS                | Laboratory Positive | May       | 2733 | 17302       | 329    | 0.02 | 12.3 (10.9, 13.6)   |
| ARDS                | Laboratory Positive | June      | 2498 | 16110       | 212    | 0.01 | 8.8 (7.5, 10.1)     |
| ARDS                | Laboratory Positive | July      | 5182 | 33655       | 349    | 0.01 | 6.9 (6.2, 7.6)      |
| ARDS                | Laboratory Positive | August    | 3736 | 22958       | 220    | 0.01 | 5.8 (5.1, 6.6)      |
| ARDS                | Laboratory Positive | September | 3233 | 19868       | 212    | 0.01 | 6.4 (5.5, 7.3)      |
| ARDS                | Laboratory Positive | October   | 5137 | 32221       | 301    | 0.01 | 5.8 (5.1, 6.5)      |
| ARDS                | Laboratory Positive | November  | 4853 | 30601       | 246    | 0.01 | 5.0 (4.4, 5.7)      |
| ARDS                | Clinical            | January   | 25   | 112         | 17     | 0.15 | 21.8 (10.7, 32.8)   |
| ARDS                | Clinical            | February  | 293  | 1057        | 182    | 0.17 | 50.0 (41.7, 58.3)   |
| ARDS                | Clinical            | March     | 1252 | 6608        | 330    | 0.05 | 25.8 (22.8, 28.8)   |
| ARDS                | Clinical            | April     | 3367 | 18135       | 367    | 0.02 | 10.9 (9.7, 12.0)    |
| ARDS                | Clinical            | May       | 2213 | 11762       | 229    | 0.02 | 10.3 (8.9, 11.7)    |
| ARDS                | Clinical            | June      | 1429 | 7121        | 156    | 0.02 | 10.3 (8.6, 12.0)    |
| ARDS                | Clinical            | July      | 1315 | 6391        | 222    | 0.03 | 16.5 (14.3, 18.8)   |
| ARDS                | Clinical            | August    | 1024 | 4875        | 207    | 0.04 | 21.0 (17.8, 24.2)   |
| ARDS                | Clinical            | September | 798  | 3946        | 192    | 0.05 | 23.8 (20.0, 27.6)   |
| ARDS                | Clinical            | October   | 1203 | 6408        | 268    | 0.04 | 22.7 (19.8, 25.6)   |
| ARDS                | Clinical            | November  | 974  | 5714        | 173    | 0.03 | 17.5 (14.7, 20.3)   |
| Respiratory Failure | Laboratory Positive | March     | 3986 | 9766        | 2510   | 0.26 | 62.4 (59.9, 64.9)   |
| Respiratory Failure | Laboratory Positive | April     | 6259 | 14851       | 3906   | 0.26 | 61.4 (59.5, 63.3)   |
| Respiratory Failure | Laboratory Positive | May       | 2733 | 8580        | 1338   | 0.16 | 50.0 (47.3, 52.7)   |
| Respiratory Failure | Laboratory Positive | June      | 2498 | 9117        | 1046   | 0.11 | 43.6 (40.8, 46.3)   |
| Respiratory Failure | Laboratory Positive | July      | 5182 | 18877       | 2144   | 0.11 | 42.0 (40.3, 43.8)   |
| Respiratory Failure | Laboratory Positive | August    | 3736 | 12843       | 1484   | 0.12 | 40.0 (37.9, 42.0)   |

|                            |                     |           |      |       |      |      |                   |
|----------------------------|---------------------|-----------|------|-------|------|------|-------------------|
| <b>Respiratory Failure</b> | Laboratory Positive | September | 3233 | 10234 | 1431 | 0.14 | 44.2 (41.9, 46.5) |
| <b>Respiratory Failure</b> | Laboratory Positive | October   | 5137 | 16967 | 2342 | 0.14 | 44.7 (42.9, 46.5) |
| <b>Respiratory Failure</b> | Laboratory Positive | November  | 4853 | 18150 | 1910 | 0.11 | 38.5 (36.7, 40.2) |
| <b>Respiratory Failure</b> | Clinical            | January   | 25   | 67    | 19   | 0.28 | 24.4 (12.8, 36.1) |
| <b>Respiratory Failure</b> | Clinical            | February  | 293  | 844   | 199  | 0.24 | 56.5 (47.6, 65.4) |
| <b>Respiratory Failure</b> | Clinical            | March     | 1252 | 3397  | 686  | 0.20 | 54.8 (50.4, 59.2) |
| <b>Respiratory Failure</b> | Clinical            | April     | 3367 | 8797  | 1642 | 0.19 | 48.5 (46.1, 50.9) |
| <b>Respiratory Failure</b> | Clinical            | May       | 2213 | 6845  | 898  | 0.13 | 41.3 (38.5, 44.1) |
| <b>Respiratory Failure</b> | Clinical            | June      | 1429 | 4593  | 519  | 0.11 | 36.6 (33.3, 39.9) |
| <b>Respiratory Failure</b> | Clinical            | July      | 1315 | 4015  | 536  | 0.13 | 41.2 (37.6, 44.9) |
| <b>Respiratory Failure</b> | Clinical            | August    | 1024 | 3169  | 433  | 0.14 | 42.6 (38.2, 46.9) |
| <b>Respiratory Failure</b> | Clinical            | September | 798  | 2504  | 373  | 0.15 | 48.1 (42.6, 53.6) |
| <b>Respiratory Failure</b> | Clinical            | October   | 1203 | 3879  | 589  | 0.15 | 47.3 (43.3, 51.3) |
| <b>Respiratory Failure</b> | Clinical            | November  | 974  | 3249  | 477  | 0.15 | 47.7 (43.1, 52.4) |
| <b>Death</b>               | Laboratory Positive | March     | 3986 | 36165 | 660  | 0.02 | 17.5 (16.1, 18.9) |
| <b>Death</b>               | Laboratory Positive | April     | 6259 | 51579 | 1038 | 0.02 | 15.7 (14.7, 16.7) |
| <b>Death</b>               | Laboratory Positive | May       | 2733 | 21914 | 307  | 0.01 | 11.3 (10.0, 12.7) |
| <b>Death</b>               | Laboratory Positive | June      | 2498 | 19085 | 198  | 0.01 | 9.8 (8.4, 11.2)   |
| <b>Death</b>               | Laboratory Positive | July      | 5182 | 38544 | 502  | 0.01 | 10.5 (9.6, 11.4)  |
| <b>Death</b>               | Laboratory Positive | August    | 3736 | 25718 | 366  | 0.01 | 9.6 (8.6, 10.6)   |
| <b>Death</b>               | Laboratory Positive | September | 3233 | 22327 | 362  | 0.02 | 10.8 (9.7, 12.0)  |
| <b>Death</b>               | Laboratory Positive | October   | 5137 | 36177 | 580  | 0.02 | 10.2 (9.3, 11.0)  |
| <b>Death</b>               | Laboratory Positive | November  | 4853 | 33835 | 536  | 0.02 | 9.8 (8.9, 10.6)   |
| <b>Death</b>               | Clinical            | January   | 25   | 426   | 1    | 0.00 | 0.6 (0.0, 1.9)    |
| <b>Death</b>               | Clinical            | February  | 293  | 3476  | 43   | 0.01 | 13.8 (9.0, 18.6)  |

|                            |                     |           |      |       |     |      |                   |
|----------------------------|---------------------|-----------|------|-------|-----|------|-------------------|
| <b>Death</b>               | Clinical            | March     | 1252 | 10528 | 175 | 0.02 | 14.8 (12.5, 17.1) |
| <b>Death</b>               | Clinical            | April     | 3367 | 22146 | 439 | 0.02 | 13.1 (11.8, 14.3) |
| <b>Death</b>               | Clinical            | May       | 2213 | 14457 | 235 | 0.02 | 11.5 (9.9, 13.1)  |
| <b>Death</b>               | Clinical            | June      | 1429 | 8931  | 116 | 0.01 | 8.9 (7.2, 10.6)   |
| <b>Death</b>               | Clinical            | July      | 1315 | 8972  | 142 | 0.02 | 11.8 (9.8, 13.9)  |
| <b>Death</b>               | Clinical            | August    | 1024 | 7207  | 116 | 0.02 | 12.5 (9.9, 15.1)  |
| <b>Death</b>               | Clinical            | September | 798  | 6035  | 127 | 0.02 | 16.0 (13.0, 19.0) |
| <b>Death</b>               | Clinical            | October   | 1203 | 9653  | 189 | 0.02 | 15.3 (13.0, 17.7) |
| <b>Death</b>               | Clinical            | November  | 974  | 7657  | 127 | 0.02 | 11.8 (9.6, 13.9)  |
| <b>VTE</b>                 | Laboratory Positive | March     | 3986 | 32308 | 286 | 0.01 | 7.1 (6.2, 7.9)    |
| <b>VTE</b>                 | Laboratory Positive | April     | 6259 | 46264 | 479 | 0.01 | 7.5 (6.8, 8.2)    |
| <b>VTE</b>                 | Laboratory Positive | May       | 2733 | 20252 | 160 | 0.01 | 5.9 (4.9, 6.9)    |
| <b>VTE</b>                 | Laboratory Positive | June      | 2498 | 17991 | 120 | 0.01 | 4.7 (3.8, 5.6)    |
| <b>VTE</b>                 | Laboratory Positive | July      | 5182 | 36339 | 251 | 0.01 | 4.8 (4.2, 5.4)    |
| <b>VTE</b>                 | Laboratory Positive | August    | 3736 | 24334 | 175 | 0.01 | 4.7 (4.0, 5.5)    |
| <b>VTE</b>                 | Laboratory Positive | September | 3233 | 20876 | 165 | 0.01 | 5.2 (4.4, 6.0)    |
| <b>VTE</b>                 | Laboratory Positive | October   | 5137 | 34338 | 221 | 0.01 | 4.3 (3.7, 4.9)    |
| <b>VTE</b>                 | Laboratory Positive | November  | 4853 | 32123 | 209 | 0.01 | 4.1 (3.6, 4.7)    |
| <b>VTE</b>                 | Clinical            | January   | 25   | 348   | 3   | 0.01 | 2.5 (0.0, 5.8)    |
| <b>VTE</b>                 | Clinical            | February  | 293  | 2896  | 35  | 0.01 | 11.1 (6.8, 15.3)  |
| <b>VTE</b>                 | Clinical            | March     | 1252 | 9683  | 72  | 0.01 | 6.1 (4.5, 7.6)    |
| <b>VTE</b>                 | Clinical            | April     | 3367 | 20018 | 241 | 0.01 | 7.1 (6.2, 8.0)    |
| <b>VTE</b>                 | Clinical            | May       | 2213 | 12797 | 168 | 0.01 | 7.9 (6.7, 9.2)    |
| <b>VTE</b>                 | Clinical            | June      | 1429 | 8175  | 75  | 0.01 | 5.6 (4.2, 7.0)    |
| <b>VTE</b>                 | Clinical            | July      | 1315 | 8252  | 76  | 0.01 | 5.8 (4.4, 7.1)    |
| <b>VTE</b>                 | Clinical            | August    | 1024 | 6508  | 83  | 0.01 | 8.0 (6.1, 9.8)    |
| <b>VTE</b>                 | Clinical            | September | 798  | 5403  | 65  | 0.01 | 8.8 (6.3, 11.3)   |
| <b>VTE</b>                 | Clinical            | October   | 1203 | 8820  | 75  | 0.01 | 6.1 (4.7, 7.5)    |
| <b>VTE</b>                 | Clinical            | November  | 974  | 7123  | 54  | 0.01 | 5.8 (4.1, 7.5)    |
| <b>Acute renal failure</b> | Laboratory Positive | March     | 3986 | 32989 | 166 | 0.01 | 3.9 (3.3, 4.5)    |
| <b>Acute renal failure</b> | Laboratory Positive | April     | 6259 | 48120 | 190 | 0.00 | 3.0 (2.5, 3.4)    |
| <b>Acute renal failure</b> | Laboratory Positive | May       | 2733 | 20571 | 78  | 0.00 | 3.0 (2.3, 3.7)    |
| <b>Acute renal failure</b> | Laboratory Positive | June      | 2498 | 18336 | 38  | 0.00 | 1.5 (1.0, 2.1)    |
| <b>Acute renal failure</b> | Laboratory Positive | July      | 5182 | 37442 | 59  | 0.00 | 1.2 (0.9, 1.5)    |
| <b>Acute renal failure</b> | Laboratory Positive | August    | 3736 | 24959 | 46  | 0.00 | 1.2 (0.9, 1.6)    |

|                                          |                     |           |      |       |     |      |                   |
|------------------------------------------|---------------------|-----------|------|-------|-----|------|-------------------|
| <b>Acute renal failure</b>               | Laboratory Positive | September | 3233 | 21945 | 25  | 0.00 | 0.8 (0.5, 1.1)    |
| <b>Acute renal failure</b>               | Laboratory Positive | October   | 5137 | 35502 | 43  | 0.00 | 0.8 (0.6, 1.1)    |
| <b>Acute renal failure</b>               | Laboratory Positive | November  | 4853 | 33370 | 36  | 0.00 | 0.7 (0.5, 1.0)    |
| <b>Acute renal failure</b>               | Clinical            | January   | 25   | 292   | 5   | 0.02 | 6.2 (0.2, 12.2)   |
| <b>Acute renal failure</b>               | Clinical            | February  | 293  | 2947  | 26  | 0.01 | 7.6 (4.0, 11.3)   |
| <b>Acute renal failure</b>               | Clinical            | March     | 1252 | 9724  | 44  | 0.00 | 3.0 (2.1, 4.0)    |
| <b>Acute renal failure</b>               | Clinical            | April     | 3367 | 21015 | 69  | 0.00 | 2.0 (1.5, 2.5)    |
| <b>Acute renal failure</b>               | Clinical            | May       | 2213 | 13434 | 58  | 0.00 | 2.8 (2.0, 3.5)    |
| <b>Acute renal failure</b>               | Clinical            | June      | 1429 | 8546  | 28  | 0.00 | 2.0 (1.2, 2.7)    |
| <b>Acute renal failure</b>               | Clinical            | July      | 1315 | 8612  | 22  | 0.00 | 1.7 (1.0, 2.5)    |
| <b>Acute renal failure</b>               | Clinical            | August    | 1024 | 6939  | 24  | 0.00 | 2.6 (1.4, 3.9)    |
| <b>Acute renal failure</b>               | Clinical            | September | 798  | 5668  | 26  | 0.00 | 3.3 (1.6, 5.0)    |
| <b>Acute renal failure</b>               | Clinical            | October   | 1203 | 9181  | 27  | 0.00 | 2.4 (1.4, 3.4)    |
| <b>Acute renal failure</b>               | Clinical            | November  | 974  | 7403  | 14  | 0.00 | 1.2 (0.6, 1.9)    |
| <b>Heart failure</b>                     | Laboratory Positive | March     | 3986 | 34007 | 210 | 0.01 | 5.4 (4.6, 6.2)    |
| <b>Heart failure</b>                     | Laboratory Positive | April     | 6259 | 48011 | 366 | 0.01 | 5.6 (5.1, 6.2)    |
| <b>Heart failure</b>                     | Laboratory Positive | May       | 2733 | 20425 | 149 | 0.01 | 5.7 (4.7, 6.6)    |
| <b>Heart failure</b>                     | Laboratory Positive | June      | 2498 | 17772 | 124 | 0.01 | 5.9 (4.8, 7.0)    |
| <b>Heart failure</b>                     | Laboratory Positive | July      | 5182 | 36752 | 199 | 0.01 | 4.0 (3.5, 4.6)    |
| <b>Heart failure</b>                     | Laboratory Positive | August    | 3736 | 24118 | 175 | 0.01 | 4.7 (4.0, 5.4)    |
| <b>Heart failure</b>                     | Laboratory Positive | September | 3233 | 21020 | 153 | 0.01 | 4.8 (4.0, 5.5)    |
| <b>Heart failure</b>                     | Laboratory Positive | October   | 5137 | 34005 | 252 | 0.01 | 4.5 (4.0, 5.1)    |
| <b>Heart failure</b>                     | Laboratory Positive | November  | 4853 | 32464 | 168 | 0.01 | 3.2 (2.7, 3.6)    |
| <b>Heart failure</b>                     | Clinical            | January   | 25   | 330   | 5   | 0.02 | 5.5 (0.2, 10.9)   |
| <b>Heart failure</b>                     | Clinical            | February  | 293  | 2648  | 54  | 0.02 | 16.2 (11.4, 21.0) |
| <b>Heart failure</b>                     | Clinical            | March     | 1252 | 9176  | 109 | 0.01 | 8.6 (6.8, 10.3)   |
| <b>Heart failure</b>                     | Clinical            | April     | 3367 | 20144 | 244 | 0.01 | 7.5 (6.5, 8.4)    |
| <b>Heart failure</b>                     | Clinical            | May       | 2213 | 12718 | 209 | 0.02 | 9.7 (8.3, 11.0)   |
| <b>Heart failure</b>                     | Clinical            | June      | 1429 | 7885  | 126 | 0.02 | 9.2 (7.5, 10.9)   |
| <b>Heart failure</b>                     | Clinical            | July      | 1315 | 8265  | 91  | 0.01 | 7.1 (5.5, 8.6)    |
| <b>Heart failure</b>                     | Clinical            | August    | 1024 | 6461  | 80  | 0.01 | 8.0 (6.1, 9.9)    |
| <b>Heart failure</b>                     | Clinical            | September | 798  | 5358  | 70  | 0.01 | 8.4 (6.3, 10.6)   |
| <b>Heart failure</b>                     | Clinical            | October   | 1203 | 8711  | 103 | 0.01 | 8.5 (6.8, 10.3)   |
| <b>Heart failure</b>                     | Clinical            | November  | 974  | 7027  | 65  | 0.01 | 6.2 (4.6, 7.8)    |
| <b>ECMO or Invasive Mech Ventilation</b> | Laboratory Positive | March     | 3986 | 23225 | 916 | 0.04 | 22.5 (21.0, 24.0) |

|                                              |                     |           |      |       |     |      |                   |
|----------------------------------------------|---------------------|-----------|------|-------|-----|------|-------------------|
| <b>ECMO or Invasive Mech Ventilation</b>     | Laboratory Positive | April     | 6259 | 38399 | 991 | 0.03 | 15.6 (14.6, 16.6) |
| <b>ECMO or Invasive Mech Ventilation</b>     | Laboratory Positive | May       | 2733 | 17282 | 340 | 0.02 | 12.7 (11.4, 14.1) |
| <b>ECMO or Invasive Mech Ventilation</b>     | Laboratory Positive | June      | 2498 | 15695 | 248 | 0.02 | 10.9 (9.4, 12.3)  |
| <b>ECMO or Invasive Mech Ventilation</b>     | Laboratory Positive | July      | 5182 | 32372 | 468 | 0.01 | 9.3 (8.5, 10.2)   |
| <b>ECMO or Invasive Mech Ventilation</b>     | Laboratory Positive | August    | 3736 | 22414 | 291 | 0.01 | 7.8 (6.9, 8.7)    |
| <b>ECMO or Invasive Mech Ventilation</b>     | Laboratory Positive | September | 3233 | 19425 | 281 | 0.01 | 8.6 (7.6, 9.7)    |
| <b>ECMO or Invasive Mech Ventilation</b>     | Laboratory Positive | October   | 5137 | 31847 | 418 | 0.01 | 8.0 (7.2, 8.8)    |
| <b>ECMO or Invasive Mech Ventilation</b>     | Laboratory Positive | November  | 4853 | 30198 | 360 | 0.01 | 7.2 (6.4, 8.0)    |
| <b>ECMO or Invasive Mech Ventilation</b>     | Clinical            | January   | 25   | 91    | 16  | 0.18 | 19.5 (9.3, 29.7)  |
| <b>ECMO or Invasive Mech Ventilation</b>     | Clinical            | February  | 293  | 1554  | 130 | 0.08 | 35.3 (28.3, 42.2) |
| <b>ECMO or Invasive Mech Ventilation</b>     | Clinical            | March     | 1252 | 6589  | 302 | 0.05 | 22.8 (20.1, 25.5) |
| <b>ECMO or Invasive Mech Ventilation</b>     | Clinical            | April     | 3367 | 17431 | 414 | 0.02 | 12.4 (11.2, 13.6) |
| <b>ECMO or Invasive Mech Ventilation</b>     | Clinical            | May       | 2213 | 11208 | 280 | 0.02 | 12.8 (11.2, 14.3) |
| <b>ECMO or Invasive Mech Ventilation</b>     | Clinical            | June      | 1429 | 7216  | 155 | 0.02 | 10.4 (8.7, 12.1)  |
| <b>ECMO or Invasive Mech Ventilation</b>     | Clinical            | July      | 1315 | 6520  | 206 | 0.03 | 15.9 (13.6, 18.2) |
| <b>ECMO or Invasive Mech Ventilation</b>     | Clinical            | August    | 1024 | 5265  | 168 | 0.03 | 16.7 (14.0, 19.5) |
| <b>ECMO or Invasive Mech Ventilation</b>     | Clinical            | September | 798  | 4450  | 148 | 0.03 | 18.9 (15.3, 22.5) |
| <b>ECMO or Invasive Mech Ventilation</b>     | Clinical            | October   | 1203 | 7128  | 206 | 0.03 | 17.1 (14.6, 19.5) |
| <b>ECMO or Invasive Mech Ventilation</b>     | Clinical            | November  | 974  | 6109  | 141 | 0.02 | 14.1 (11.6, 16.6) |
| <b>Acute liver injury or hepatic failure</b> | Laboratory Positive | March     | 3986 | 35116 | 69  | 0.00 | 1.7 (1.3, 2.1)    |
| <b>Acute liver injury or hepatic failure</b> | Laboratory Positive | April     | 6259 | 50254 | 93  | 0.00 | 1.4 (1.1, 1.7)    |
| <b>Acute liver injury or hepatic failure</b> | Laboratory Positive | May       | 2733 | 21345 | 48  | 0.00 | 1.7 (1.2, 2.2)    |

|                                              |                     |           |      |       |      |      |                   |
|----------------------------------------------|---------------------|-----------|------|-------|------|------|-------------------|
| <b>Acute liver injury or hepatic failure</b> | Laboratory Positive | June      | 2498 | 18656 | 35   | 0.00 | 1.5 (0.9, 2.0)    |
| <b>Acute liver injury or hepatic failure</b> | Laboratory Positive | July      | 5182 | 38126 | 39   | 0.00 | 0.8 (0.5, 1.1)    |
| <b>Acute liver injury or hepatic failure</b> | Laboratory Positive | August    | 3736 | 25439 | 26   | 0.00 | 0.7 (0.4, 1.0)    |
| <b>Acute liver injury or hepatic failure</b> | Laboratory Positive | September | 3233 | 22033 | 26   | 0.00 | 0.8 (0.5, 1.2)    |
| <b>Acute liver injury or hepatic failure</b> | Laboratory Positive | October   | 5137 | 35729 | 41   | 0.00 | 0.8 (0.6, 1.1)    |
| <b>Acute liver injury or hepatic failure</b> | Laboratory Positive | November  | 4853 | 33408 | 39   | 0.00 | 0.8 (0.5, 1.0)    |
| <b>Acute liver injury or hepatic failure</b> | Clinical            | January   | 25   | 401   | 1    | 0.00 | 0.6 (0.0, 1.9)    |
| <b>Acute liver injury or hepatic failure</b> | Clinical            | February  | 293  | 3216  | 15   | 0.00 | 3.5 (1.5, 5.6)    |
| <b>Acute liver injury or hepatic failure</b> | Clinical            | March     | 1252 | 10123 | 32   | 0.00 | 2.5 (1.6, 3.5)    |
| <b>Acute liver injury or hepatic failure</b> | Clinical            | April     | 3367 | 21455 | 63   | 0.00 | 1.8 (1.4, 2.3)    |
| <b>Acute liver injury or hepatic failure</b> | Clinical            | May       | 2213 | 13815 | 55   | 0.00 | 2.5 (1.8, 3.2)    |
| <b>Acute liver injury or hepatic failure</b> | Clinical            | June      | 1429 | 8680  | 21   | 0.00 | 1.4 (0.8, 2.0)    |
| <b>Acute liver injury or hepatic failure</b> | Clinical            | July      | 1315 | 8654  | 34   | 0.00 | 2.3 (1.5, 3.1)    |
| <b>Acute liver injury or hepatic failure</b> | Clinical            | August    | 1024 | 6827  | 34   | 0.00 | 3.6 (2.2, 5.0)    |
| <b>Acute liver injury or hepatic failure</b> | Clinical            | September | 798  | 5815  | 27   | 0.00 | 3.7 (2.2, 5.2)    |
| <b>Acute liver injury or hepatic failure</b> | Clinical            | October   | 1203 | 9223  | 39   | 0.00 | 3.3 (2.2, 4.4)    |
| <b>Acute liver injury or hepatic failure</b> | Clinical            | November  | 974  | 7416  | 16   | 0.00 | 1.9 (0.8, 2.9)    |
| <b>Arrhythmia</b>                            | Laboratory Positive | March     | 3986 | 26092 | 957  | 0.04 | 23.6 (22.1, 25.1) |
| <b>Arrhythmia</b>                            | Laboratory Positive | April     | 6259 | 38591 | 1373 | 0.04 | 21.3 (20.2, 22.4) |
| <b>Arrhythmia</b>                            | Laboratory Positive | May       | 2733 | 17752 | 421  | 0.02 | 15.6 (14.0, 17.1) |
| <b>Arrhythmia</b>                            | Laboratory Positive | June      | 2498 | 16373 | 278  | 0.02 | 12.3 (10.8, 13.9) |
| <b>Arrhythmia</b>                            | Laboratory Positive | July      | 5182 | 34321 | 502  | 0.01 | 10.0 (9.1, 10.9)  |
| <b>Arrhythmia</b>                            | Laboratory Positive | August    | 3736 | 22534 | 398  | 0.02 | 10.8 (9.7, 11.8)  |

|                      |                     |           |      |       |      |      |                   |
|----------------------|---------------------|-----------|------|-------|------|------|-------------------|
| <b>Arrhythmia</b>    | Laboratory Positive | September | 3233 | 19715 | 345  | 0.02 | 10.5 (9.4, 11.6)  |
| <b>Arrhythmia</b>    | Laboratory Positive | October   | 5137 | 32463 | 515  | 0.02 | 9.6 (8.8, 10.5)   |
| <b>Arrhythmia</b>    | Laboratory Positive | November  | 4853 | 30849 | 372  | 0.01 | 7.2 (6.5, 8.0)    |
| <b>Arrhythmia</b>    | Clinical            | January   | 25   | 336   | 4    | 0.01 | 4.8 (0.0, 10.1)   |
| <b>Arrhythmia</b>    | Clinical            | February  | 293  | 2679  | 53   | 0.02 | 15.1 (10.4, 19.8) |
| <b>Arrhythmia</b>    | Clinical            | March     | 1252 | 8533  | 193  | 0.02 | 15.0 (12.8, 17.3) |
| <b>Arrhythmia</b>    | Clinical            | April     | 3367 | 18158 | 487  | 0.03 | 14.4 (13.1, 15.7) |
| <b>Arrhythmia</b>    | Clinical            | May       | 2213 | 12018 | 266  | 0.02 | 12.1 (10.6, 13.6) |
| <b>Arrhythmia</b>    | Clinical            | June      | 1429 | 7723  | 158  | 0.02 | 11.6 (9.7, 13.5)  |
| <b>Arrhythmia</b>    | Clinical            | July      | 1315 | 7694  | 154  | 0.02 | 12.0 (10.0, 13.9) |
| <b>Arrhythmia</b>    | Clinical            | August    | 1024 | 6130  | 130  | 0.02 | 13.1 (10.7, 15.5) |
| <b>Arrhythmia</b>    | Clinical            | September | 798  | 5243  | 101  | 0.02 | 13.0 (10.1, 15.9) |
| <b>Arrhythmia</b>    | Clinical            | October   | 1203 | 7997  | 161  | 0.02 | 13.6 (11.3, 16.0) |
| <b>Arrhythmia</b>    | Clinical            | November  | 974  | 6442  | 122  | 0.02 | 11.9 (9.5, 14.2)  |
| <b>Stroke or TIA</b> | Laboratory Positive | March     | 3986 | 35024 | 76   | 0.00 | 1.8 (1.4, 2.2)    |
| <b>Stroke or TIA</b> | Laboratory Positive | April     | 6259 | 49999 | 132  | 0.00 | 2.0 (1.7, 2.4)    |
| <b>Stroke or TIA</b> | Laboratory Positive | May       | 2733 | 21229 | 53   | 0.00 | 2.0 (1.5, 2.6)    |
| <b>Stroke or TIA</b> | Laboratory Positive | June      | 2498 | 18562 | 47   | 0.00 | 2.0 (1.3, 2.6)    |
| <b>Stroke or TIA</b> | Laboratory Positive | July      | 5182 | 37983 | 66   | 0.00 | 1.3 (1.0, 1.7)    |
| <b>Stroke or TIA</b> | Laboratory Positive | August    | 3736 | 25139 | 55   | 0.00 | 1.5 (1.1, 1.9)    |
| <b>Stroke or TIA</b> | Laboratory Positive | September | 3233 | 22027 | 40   | 0.00 | 1.1 (0.8, 1.5)    |
| <b>Stroke or TIA</b> | Laboratory Positive | October   | 5137 | 35683 | 60   | 0.00 | 1.1 (0.8, 1.3)    |
| <b>Stroke or TIA</b> | Laboratory Positive | November  | 4853 | 33253 | 58   | 0.00 | 1.1 (0.8, 1.4)    |
| <b>Stroke or TIA</b> | Clinical            | January   | 25   | 426   | 0    | 0.00 | 0.0 (0.0, 0.0)    |
| <b>Stroke or TIA</b> | Clinical            | February  | 293  | 3309  | 12   | 0.00 | 3.2 (1.1, 5.3)    |
| <b>Stroke or TIA</b> | Clinical            | March     | 1252 | 10293 | 21   | 0.00 | 1.5 (0.8, 2.2)    |
| <b>Stroke or TIA</b> | Clinical            | April     | 3367 | 21513 | 64   | 0.00 | 1.9 (1.4, 2.3)    |
| <b>Stroke or TIA</b> | Clinical            | May       | 2213 | 14023 | 44   | 0.00 | 2.1 (1.4, 2.7)    |
| <b>Stroke or TIA</b> | Clinical            | June      | 1429 | 8747  | 28   | 0.00 | 2.1 (1.3, 2.9)    |
| <b>Stroke or TIA</b> | Clinical            | July      | 1315 | 8701  | 22   | 0.00 | 1.8 (1.0, 2.5)    |
| <b>Stroke or TIA</b> | Clinical            | August    | 1024 | 6947  | 18   | 0.00 | 1.7 (0.9, 2.5)    |
| <b>Stroke or TIA</b> | Clinical            | September | 798  | 5882  | 10   | 0.00 | 1.5 (0.5, 2.5)    |
| <b>Stroke or TIA</b> | Clinical            | October   | 1203 | 9370  | 22   | 0.00 | 1.8 (1.0, 2.6)    |
| <b>Stroke or TIA</b> | Clinical            | November  | 974  | 7512  | 12   | 0.00 | 1.2 (0.5, 1.9)    |
| <b>Discharge</b>     | Laboratory Positive | March     | 3986 | 36165 | 3059 | 0.08 | 75.3 (72.5, 78.0) |
| <b>Discharge</b>     | Laboratory Positive | April     | 6259 | 51579 | 4915 | 0.10 | 79.1 (77.0, 81.3) |

|           |                     |           |      |       |      |      |                   |
|-----------|---------------------|-----------|------|-------|------|------|-------------------|
| Discharge | Laboratory Positive | May       | 2733 | 21914 | 2296 | 0.10 | 83.5 (80.1, 87.0) |
| Discharge | Laboratory Positive | June      | 2498 | 19085 | 2183 | 0.11 | 84.9 (81.2, 88.7) |
| Discharge | Laboratory Positive | July      | 5182 | 38544 | 4483 | 0.12 | 85.2 (82.7, 87.6) |
| Discharge | Laboratory Positive | August    | 3736 | 25718 | 3249 | 0.13 | 87.0 (84.0, 89.9) |
| Discharge | Laboratory Positive | September | 3233 | 22327 | 2799 | 0.13 | 86.8 (83.6, 90.0) |
| Discharge | Laboratory Positive | October   | 5137 | 36177 | 4430 | 0.12 | 87.2 (84.7, 89.8) |
| Discharge | Laboratory Positive | November  | 4853 | 33835 | 4170 | 0.12 | 87.4 (84.7, 90.0) |
| Discharge | Clinical            | January   | 25   | 426   | 18   | 0.04 | 21.9 (10.9, 32.8) |
| Discharge | Clinical            | February  | 293  | 3476  | 213  | 0.06 | 59.4 (50.3, 68.6) |
| Discharge | Clinical            | March     | 1252 | 10528 | 1000 | 0.09 | 78.3 (73.1, 83.5) |
| Discharge | Clinical            | April     | 3367 | 22146 | 2807 | 0.13 | 83.3 (80.2, 86.4) |
| Discharge | Clinical            | May       | 2213 | 14457 | 1901 | 0.13 | 84.9 (81.0, 88.8) |
| Discharge | Clinical            | June      | 1429 | 8931  | 1258 | 0.14 | 87.0 (81.9, 92.0) |
| Discharge | Clinical            | July      | 1315 | 8972  | 1117 | 0.12 | 83.9 (78.7, 89.0) |
| Discharge | Clinical            | August    | 1024 | 7207  | 875  | 0.12 | 83.4 (77.6, 89.2) |
| Discharge | Clinical            | September | 798  | 6035  | 635  | 0.11 | 77.8 (71.1, 84.5) |
| Discharge | Clinical            | October   | 1203 | 9653  | 945  | 0.10 | 78.3 (73.0, 83.6) |
| Discharge | Clinical            | November  | 974  | 7657  | 798  | 0.10 | 81.2 (75.1, 87.2) |
| ICU       | Laboratory Positive | March     | 3986 | 21254 | 1065 | 0.05 | 26.1 (24.5, 27.8) |
| ICU       | Laboratory Positive | April     | 6259 | 33892 | 1354 | 0.04 | 21.4 (20.2, 22.5) |
| ICU       | Laboratory Positive | May       | 2733 | 14253 | 610  | 0.04 | 23.0 (21.1, 24.9) |
| ICU       | Laboratory Positive | June      | 2498 | 14102 | 411  | 0.03 | 17.5 (15.7, 19.3) |
| ICU       | Laboratory Positive | July      | 5182 | 29956 | 733  | 0.02 | 14.4 (13.4, 15.5) |
| ICU       | Laboratory Positive | August    | 3736 | 20854 | 468  | 0.02 | 12.6 (11.4, 13.8) |
| ICU       | Laboratory Positive | September | 3233 | 17254 | 500  | 0.03 | 15.4 (14.0, 16.8) |
| ICU       | Laboratory Positive | October   | 5137 | 29012 | 748  | 0.03 | 14.1 (13.0, 15.1) |
| ICU       | Laboratory Positive | November  | 4853 | 27412 | 693  | 0.03 | 13.8 (12.8, 14.9) |
| ICU       | Clinical            | January   | 25   | 65    | 19   | 0.29 | 23.0 (11.9, 34.1) |
| ICU       | Clinical            | February  | 293  | 1038  | 164  | 0.16 | 45.0 (37.2, 52.9) |
| ICU       | Clinical            | March     | 1252 | 5297  | 401  | 0.08 | 31.1 (27.9, 34.4) |
| ICU       | Clinical            | April     | 3367 | 15215 | 660  | 0.04 | 19.6 (18.0, 21.1) |
| ICU       | Clinical            | May       | 2213 | 9857  | 395  | 0.04 | 18.2 (16.4, 20.1) |
| ICU       | Clinical            | June      | 1429 | 6352  | 245  | 0.04 | 17.3 (15.1, 19.6) |
| ICU       | Clinical            | July      | 1315 | 5827  | 271  | 0.05 | 21.3 (18.6, 23.9) |
| ICU       | Clinical            | August    | 1024 | 4636  | 243  | 0.05 | 23.7 (20.5, 27.0) |



|            |          |           |      |      |     |      |                   |
|------------|----------|-----------|------|------|-----|------|-------------------|
| <b>ICU</b> | Clinical | September | 798  | 4105 | 184 | 0.04 | 24.7 (20.5, 28.8) |
| <b>ICU</b> | Clinical | October   | 1203 | 6612 | 285 | 0.04 | 23.2 (20.3, 26.0) |
| <b>ICU</b> | Clinical | November  | 974  | 5492 | 217 | 0.04 | 21.7 (18.5, 24.9) |
