# Supplementary material
Source: HighWire-hosted journal article supplement (https://bmjopen.bmj.com/content/12/2/e055137)

## Supplemental Figure 6. Patient Counts and Cumulative Risk of Other Outcomes by Month, Standardized by Age, Sex, and the Interaction of Age and Sex

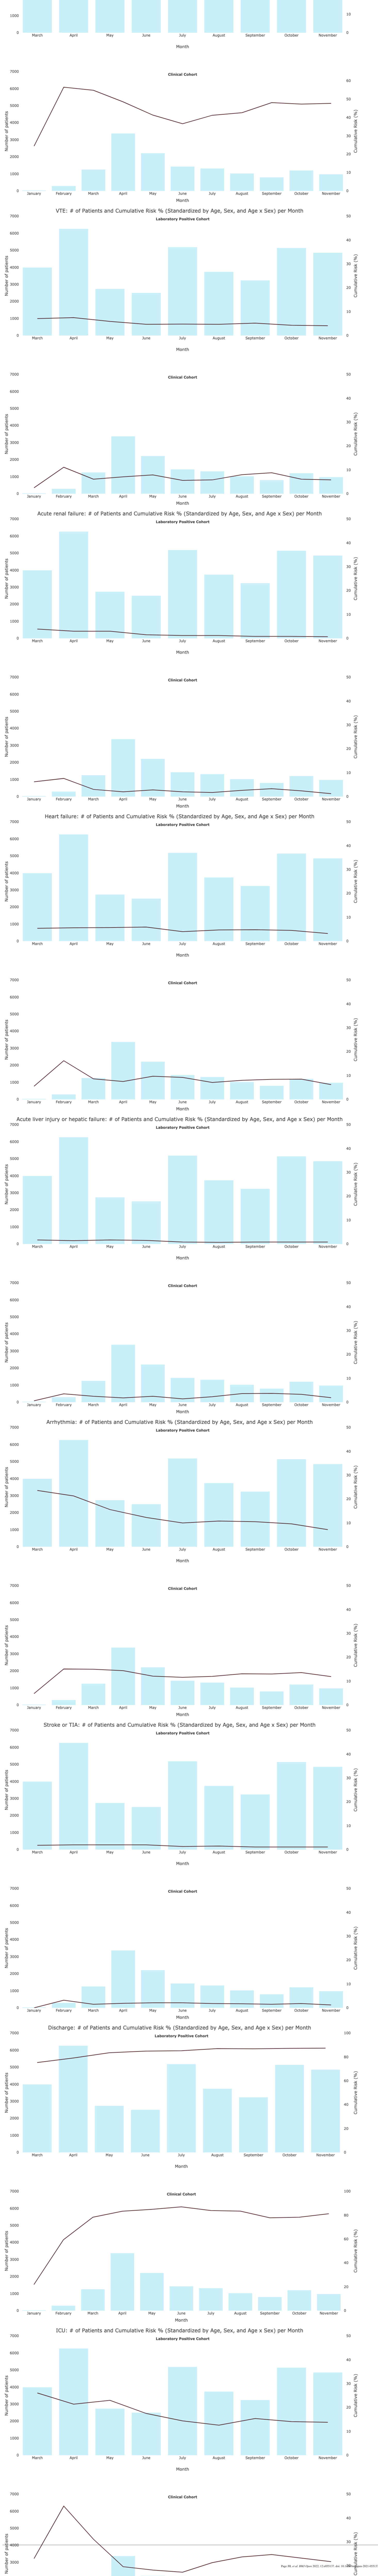

Supplement: inline-supplementary-material-11 [file inline-supplementary-material-11.pdf]
